# Supplementary material for: BUSES METALLIQUES - ETUDE DU COMPACTAGE DES REMBLAIS DE CALAGE
Source: Royal Society of Chemistry journal article supplement (doi:10.1039/c0cc01730b), 1983-11-01
Supplement: c0cc01730b.pdf [file c0cc01730b.pdf]

## Supporting Information

for

### Diindeno[1,2,3,4-*defg*;1',2',3',4'-*mnop*]chrysenes: Solution-Phase Synthesis and The Bowl-to-Bowl Inversion Barrier

Hung-Ing Chang,<sup>a</sup> Hsin-Ting Huang,<sup>a</sup> Cheng-Hao Huang,<sup>b</sup> Ming-Yu Kuo,<sup>b</sup> Yao-Ting Wu\*<sup>a</sup>

<sup>a</sup>Department of Chemistry, National Cheng-Kung University, No.1 Ta-Hsueh Rd., 70101 Tainan, Taiwan

<sup>b</sup>Department of Applied Chemistry, National Chi Nan University, No. 1 University Rd., 54561 Puli, Nantou, Taiwan

E-mail: ytwuchem@mail.ncku.edu.tw

#### Index

#### **A Synthetic Procedures and Analytic Data**

- |     |                                                    |      |
|-----|----------------------------------------------------|------|
| A.1 | Synthesis of alkyne <b>8</b> and biphenyl <b>7</b> | SI-2 |
| A.2 | Preparation of phenanthrenes <b>3</b>              | SI-3 |
| A.3 | Synthesis of bulkybowls <b>2</b>                   | SI-4 |

#### **B Computational Results**

- |     |                               |      |
|-----|-------------------------------|------|
| B.1 | Summary of computational data | SI-5 |
| B.2 | Cartesian coordinates         | SI-8 |

#### **C NMR spectra and VT-NMR Experiments** SI-39

#### **D Reference** SI-46

## A. Synthetic Procedures and Analytic Data

### General:

$^1\text{H}$  and  $^{13}\text{C}$  NMR: Bruker 300 (300 and 75.5 MHz) and 500 (500 and 125 MHz). Melting points were determined with a Büchi melting point apparatus B545 and are uncorrected.  $\text{PdCl}_2(\text{PCy}_3)_2$  was purchased from Strem Chemical. 1,3-Dichloro-2-ethynylbenzene was prepared from 1,3-dichloro-2-iodobenzene in 96% yield according to the published procedure.<sup>S1</sup> Other compounds, which are not mentioned in experimental section, are commercially available.

### A.1. Synthesis of alkyne **8** and biphenyls **7**

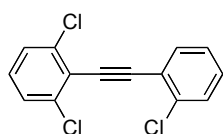

2,2',6-Trichlorodiphenylethyne (**8**): A mixture of 1-chloro-2-iodobenzene (5.02 g, 21.1 mmol),  $\text{Pd}(\text{PPh}_3)_4$  (608.1 mg, 0.82 mmol) and bis(2,6-dichlorophenylethynyl)zinc, which was generated from 1,3-dichloro-2-ethynylbenzene (3.01 g, 17.5 mmol), THF (35 mL), *n*-butyllithium (7.7 mL, 2.50 M in hexane, 19.2 mmol) and  $\text{ZnBr}_2$  (1.98 g, 8.79 mmol), was stirred at 50 °C under nitrogen for 20 h. After cooling to room temperature and diluted with  $\text{NH}_4\text{Cl}$  aqueous solution (30 mL), the solution was extracted with  $\text{CH}_2\text{Cl}_2$  (3 x 20 mL). The combined organic phases were dried over  $\text{MgSO}_4$  and filtered. The solvents of the filtrate were removed under reduced pressure. The residue was subjected to chromatography on silica gel. Elution with hexane gave alkyne **8** (4.04 g, 82%) as white solids, m. p. 73.6–74.6 °C.  $^1\text{H}$  NMR (300 MHz,  $\text{CDCl}_3$ , ppm):  $\delta$  = 7.15–7.39 (m, 5H), 7.45 (dd,  $J$  = 6.8,  $J$  = 1.6 Hz, 1H), 7.65 (dd,  $J$  = 6.8,  $J$  = 1.6 Hz, 1H).  $^{13}\text{C}$  NMR (75.5 MHz,  $\text{CDCl}_3$ , plus DEPT, ppm):  $\delta$  = 88.3 ( $\text{C}_{\text{quat}}$ ), 96.4 ( $\text{C}_{\text{quat}}$ ), 122.7 ( $\text{C}_{\text{quat}}$ ), 123.0 ( $\text{C}_{\text{quat}}$ ), 126.4 (CH), 127.5 (x 2, CH), 129.3 (CH), 129.4 (CH), 129.9 (CH), 133.7 (CH), 136.1 ( $\text{C}_{\text{quat}}$ ), 137.4 (x 2,  $\text{C}_{\text{quat}}$ ). EI MS (70 eV),  $m/z$  (%): 284/283/282/281/280 (42/20/99/20/100) [ $\text{M}^+$ ], 210 (47), 174 (14). HRMS (EI) calcd for  $\text{C}_{14}\text{H}_7\text{Cl}_3$ : 279.9613; found: 279.9612.

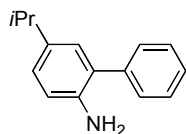

2-Amino-5-isopropylbiphenyl: Similar to Zhang's procedure,<sup>S2</sup> a mixture of  $\text{Pd}(\text{OAc})_2$  (31.5 mg, 0.14 mmol),  $\text{Na}_2\text{CO}_3$  (1.48 g, 14.0 mmol), 2-bromo-4-isopropylaniline (1.50 g, 7.01 mmol), phenylboronic acid (1.28 g, 10.5 mmol), water (7 mL), and PEG 600 (7.01 g) in a thick-wall pyrex tube was purged with nitrogen for 5 min. The sealed tube was heated at 50 °C for 10 h. After cooling to room temperature, the suspension was diluted with water and extracted with  $\text{CH}_2\text{Cl}_2$  (50 mL). The

combined organic phases were dried over  $\text{MgSO}_4$  and filtered. The solvents of the filtrate were removed under reduced pressure, and the residue was subjected to chromatography on alumina. Elution with hexane/ $\text{CH}_2\text{Cl}_2$  (10:1) gave the title compound (1.37 g, 93%) as pale yellow solids, m.p. 39.5–40.4 °C.  $^1\text{H}$  NMR (300 MHz,  $\text{CDCl}_3$ , ppm):  $\delta$  = 1.24 (d,  $J$  = 7.1 Hz, 6H), 2.85 (heptet,  $J$  = 7.1 Hz, 1H), 6.74 (d,  $J$  = 8.1 Hz, 1H), 7.01 (d,  $J$  = 1.8 Hz, 1H), 7.04 (dd,  $J$  = 8.1,  $J$  = 1.8 Hz, 1H), 7.34–7.37 (m, 1H), 7.42–7.50 (m, 4H). The signal of  $\text{NH}_2$  was not observed.  $^{13}\text{C}$  NMR (75.5 MHz,  $\text{CDCl}_3$ , plus DEPT, ppm):  $\delta$  = 24.2 (x 2,  $\text{CH}_3$ ), 33.3 (CH), 117.3 (CH), 126.4 (CH), 127.3 (CH), 128.5 (CH), 128.8 (x 2, CH), 129.2 (x 2, CH), 138.4 ( $\text{C}_{\text{quat}}$ ), 139.2 ( $\text{C}_{\text{quat}}$ ), 139.3 ( $\text{C}_{\text{quat}}$ ), 141.2 ( $\text{C}_{\text{quat}}$ ). EI MS (70 eV),  $m/z$  (%): 211 (37) [ $\text{M}^+$ ], 196 (100), 180 (33), 165 (22), 152 (18). HRMS (EI) caclcd for  $\text{C}_{15}\text{H}_{17}\text{N}$ : 211.1361; found: 211.1365.

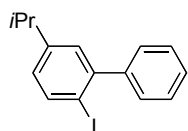

2-Iodo-5-isopropylbiphenyl (**7-iPr**): A solution of 2-amino-5-isopropylbiphenyl (1.42 g, 6.63 mmol) at 0 °C was treated with water (9 mL), *conc.* hydrochloric acid (1.8 mL), and finally dropwise added an aqueous solution of  $\text{NaNO}_2$  (0.55 g in 6.5 mL of water), and stirred at the same temperature for 35 min. An aqueous solution of KI (2.20 g, 13.2 mmol) was then added and the mixture was stirred at room temperature for 12 h. The reaction was quenched with  $\text{Na}_2\text{S}_2\text{O}_3$  aqueous solution and extracted with  $\text{CH}_2\text{Cl}_2$ . After drying over  $\text{MgSO}_4$  and filtration, the solvents of the filtrate were removed under reduced pressure, and the residue was subjected to chromatography on silica gel. Elution with hexane gave **7-iPr** (1.64 g, 78%) as colorless liquid.  $^1\text{H}$  NMR (300 MHz,  $\text{CDCl}_3$ , ppm):  $\delta$  = 1.27 (d,  $J$  = 6.8 Hz, 6H), 2.90 (heptet,  $J$  = 6.8 Hz, 1H), 6.93 (dd,  $J$  = 8.2,  $J$  = 2.2 Hz, 1H), 7.19 (d,  $J$  = 2.2 Hz, 1H), 7.35–7.44 (m, 5H), 7.86 (d,  $J$  = 8.2 Hz, 1H).  $^{13}\text{C}$  NMR (75.5 MHz,  $\text{CDCl}_3$ , plus DEPT, ppm):  $\delta$  = 23.8 (x 2,  $\text{CH}_3$ ), 33.7 (CH), 94.8 ( $\text{C}_{\text{quat}}$ ), 127.2 (CH), 127.5 (CH), 127.9 (x 2, CH), 128.5 (CH), 129.3 (x 2, CH), 139.3 (CH), 144.4 ( $\text{C}_{\text{quat}}$ ), 146.4 ( $\text{C}_{\text{quat}}$ ), 149.1 ( $\text{C}_{\text{quat}}$ ). EI MS (70 eV),  $m/z$  (%): 323/322 (47/100) [ $\text{M}^+$ ], 307 (99), 195 (24) [ $\text{M}^+ - \text{I}$ ], 180 (75), 165 (62), 152 (44). HRMS (EI) caclcd for  $\text{C}_{15}\text{H}_{15}\text{I}$ : 322.0218; found: 322.0219.

## A2. Preparation of Phenanthrenes 3:

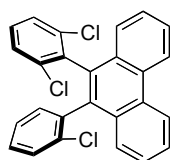

9-(2,6-Dichlorophenyl)-10-(2-chlorophenyl)phenanthrene (**3-H**): A mixture of  $\text{Pd}(\text{OAc})_2$  (40.8 mg, 0.18 mmol), LiCl (76.1 mg, 1.79 mmol), sodium acetate (590 mg, 7.14 mmol), alkyne **8** (1.21 g, 4.26 mmol), biphenyl **7-H** (1.00 g, 3.57 mmol) and DMF (20 mL) in a thick-wall pyrex tube was purged with nitrogen for 5 min. The sealed tube was heated at 100 °C for 20 h. After cooling to room temperature, the suspension was diluted with  $\text{CH}_2\text{Cl}_2$  (50 mL) and filtered through a 3 cm thick layer of Celite, and the Celite was rinsed well with  $\text{CH}_2\text{Cl}_2$  (30 mL). The solvents of the filtrate were removed

under reduced pressure, and the residue was subjected to chromatography on alumina. Elution with hexane/CH<sub>2</sub>Cl<sub>2</sub> (20:1) gave **3-H** (972 mg, 63%) as white solids, m. p. 257.7–258.4 °C. <sup>1</sup>H NMR (300 MHz, CDCl<sub>3</sub>, ppm): δ = 7.11–7.39 (m, 6H), 7.44–7.53 (m, 5H), 7.73 (t, *J* = 7.5 Hz, 2H), 8.86 (d, *J* = 8.2 Hz, 2H). <sup>13</sup>C NMR (75.5MHz, CDCl<sub>3</sub>, plus DEPT, ppm): δ = 122.8 (CH), 123.0 (CH), 126.0 (CH), 126.2 (CH), 126.8 (CH), 127.03 (CH), 127.05 (CH), 127.2 (CH), 127.4 (CH), 127.5 (CH), 128.0 (CH), 129.0 (CH), 129.2 (CH), 129.6 (CH), 130.0 (C<sub>quat</sub>), 130.3 (C<sub>quat</sub>), 130.4 (C<sub>quat</sub>), 130.6 (C<sub>quat</sub>), 131.0 (CH), 132.7 (C<sub>quat</sub>), 134.6 (C<sub>quat</sub>), 134.9 (C<sub>quat</sub>), 136.4 (x 2, C<sub>quat</sub>), 137.0 (x 2, C<sub>quat</sub>). EI MS (70 eV), *m/z* (%): 434/433/432 (99/28/100) [M<sup>+</sup>], 326 (81), 324 (57), 322 (66), 280 (83), 162 (78). HRMS (EI) caclcd for C<sub>26</sub>H<sub>15</sub>Cl<sub>3</sub>: 432.0239; found: 432.0244.

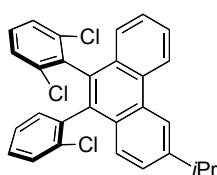

10-(2,6-Dichlorophenyl)-10-(2-chlorophenyl)-3-isopropylphenanthrene (**3-*i*Pr**): Similar to the synthesis of **3-H**, **7-*i*Pr** (104 mg, 0.32 mmol) was conducted in this reaction. After chromatographic purification, a mixture of **3-*i*Pr** and **3'-*i*Pr** (102 mg, 65%; ratio 10:1) was obtained as white solids. **3-*i*Pr**:

m. p. 219.4–220.6 °C. <sup>1</sup>H NMR (300 MHz, CDCl<sub>3</sub>, ppm): δ = 1.43 (d, *J* = 6.9 Hz, 6H), 3.22 (heptet, *J* = 6.9 Hz, 1H), 7.10–7.34 (m, 6H), 7.38–7.54 (m, 5H), 7.71 (dd, *J* = 7.6, *J* = 2.0 Hz, 1H), 8.67 (s, 1H), 8.87 (d, *J* = 8.3 Hz, 1H). <sup>13</sup>C NMR (75.5MHz, CDCl<sub>3</sub>, plus DEPT, ppm): δ = 24.1 (CH<sub>3</sub>), 24.2 (CH<sub>3</sub>), 34.6 (CH), 120.0 (CH), 122.9 (CH), 125.97 (CH), 126.02 (CH), 126.2 (CH), 126.8 (CH), 127.0 (CH), 127.4 (CH), 127.6 (CH), 128.0 (CH), 128.88 (CH), 128.94 (C<sub>quat</sub>), 129.2 (CH), 129.6 (CH), 130.2 (C<sub>quat</sub>), 130.32 (C<sub>quat</sub>), 130.35 (C<sub>quat</sub>), 131.0 (CH), 131.9 (C<sub>quat</sub>), 134.6 (C<sub>quat</sub>), 134.8 (C<sub>quat</sub>), 136.53 (C<sub>quat</sub>), 136.55 (C<sub>quat</sub>), 137.1 (C<sub>quat</sub>), 137.2 (C<sub>quat</sub>), 147.6 (C<sub>quat</sub>). EI MS (70 eV), *m/z* (%): 476/475/474 (35/11/35) [M<sup>+</sup>], 404 (100), 389 (97), 289 (23), 263 (27). HR MS (EI) caclcd for C<sub>29</sub>H<sub>21</sub>Cl<sub>3</sub>: 474.0709; found: 474.0712.

### A.3. Synthesis of bulkybowls 2

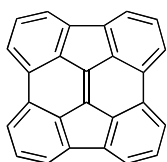

Diindeno[1,2,3,4-*defg*:1',2',3',4'-*mnop*]chrysene (**2-H**): A mixture of Cs<sub>2</sub>CO<sub>3</sub> (67.6 mg, 0.21 mmol), PdCl<sub>2</sub>(PCy<sub>3</sub>)<sub>2</sub> (30.6 mg, 0.04 mmol), DBU (31.5 mg, 0.21 mmol), phenanthrene **3-H** (30.0 mg, 0.07 mmol) and NMP (1 mL) in a thick-wall pyrex tube was purged with nitrogen for 5 min. The sealed tube was heated at 150 °C for 2 d. After cooling to room temperature, the suspension was diluted with CH<sub>2</sub>Cl<sub>2</sub> (10 mL) and filtered through a 3 cm thick layer of Celite, and the Celite was rinsed well with CH<sub>2</sub>Cl<sub>2</sub> (10 mL). The solvents of the filtrate were removed under reduced pressure, and the residue was subjected to chromatography on silica gel. Elution with hexane/CH<sub>2</sub>Cl<sub>2</sub> (20:1) gave **2-H** (4.70 mg, 21%) as yellow solids. <sup>1</sup>H-NMR spectrum of **2-H** in CDCl<sub>3</sub> is identical to that reported in ref. S3. <sup>1</sup>H NMR (300 MHz, CD<sub>2</sub>Cl<sub>2</sub>, ppm): δ = 7.63 (dd, *J* = 7.8, *J* = 6.8 Hz, 4H),

7.90 (d,  $J = 6.8$  Hz, 4H), 8.27 (d,  $J = 7.8$  Hz, 4H).

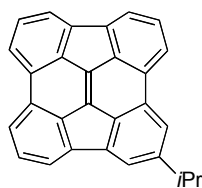

2-Isopropyl-diindeno[1,2,3,4-*defg*:1',2',3',4'-*mnop*]chrysene (**2-*iPr***): Similar to the synthesis of **2-H**, a mixture of **3-*iPr*** and **3'-*iPr*** (30.0 mg, 0.06 mmol) was conducted in this reaction. Elution with cyclohexane gave **2-*iPr*** (4.50 mg, 19%) as yellow solids, m. p. 287.3–288.1 °C. *Note: When 90.0 mg of the starting material was divided into three equal portions and conducted under the same conditions, 13.2 mg (18%) of 2-*iPr* was obtained.*  $^1\text{H}$  NMR (300 MHz,  $\text{CD}_2\text{Cl}_2$ , ppm):  $\delta = 1.42$  (d,  $J = 6.9$  Hz, 6H), 3.18 (heptet,  $J = 6.9$  Hz, 1H), 7.55–7.62 (m, 3H), 7.80 (s, 1H), 7.86 (dd,  $J = 7.1$ ,  $J = 2.3$  Hz, 3H), 8.10 (s, 1H), 8.22 (d,  $J = 8.0$  Hz, 2H), 8.26 (d,  $J = 8.0$  Hz, 1H).  $^{13}\text{C}$  NMR (75.5MHz,  $\text{CD}_2\text{Cl}_2$ , plus DEPT, ppm):  $\delta = 24.7$  (x 2,  $\text{CH}_3$ ), 35.9 (CH), 121.6 (CH), 122.0 (CH), 122.27 (x 2, CH), 122.33 (CH), 124.36 (x 3, CH), 128.45 (CH), 128.49 (CH), 128.6 (CH), 133.1 ( $\text{C}_{\text{quat}}$ ), 133.34 ( $\text{C}_{\text{quat}}$ ), 133.38 ( $\text{C}_{\text{quat}}$ ), 133.43 ( $\text{C}_{\text{quat}}$ ), 136.8 ( $\text{C}_{\text{quat}}$ ), 137.5 ( $\text{C}_{\text{quat}}$ ), 137.7 ( $\text{C}_{\text{quat}}$ ), 139.02 ( $\text{C}_{\text{quat}}$ ), 139.06 ( $\text{C}_{\text{quat}}$ ), 139.14 ( $\text{C}_{\text{quat}}$ ), 141.2 ( $\text{C}_{\text{quat}}$ ), 141.3 ( $\text{C}_{\text{quat}}$ ), 141.4 ( $\text{C}_{\text{quat}}$ ), 141.5 ( $\text{C}_{\text{quat}}$ ), 150.7 ( $\text{C}_{\text{quat}}$ ). EI MS (70 eV),  $m/z$  (%): 366 (2) [ $\text{M}^+$ ], 248 (69), 205 (100). HRMS (EI) caclcd for  $\text{C}_{29}\text{H}_{18}$ : 366.1409; found: 366.1413.

## B. Computational Results

### B.1 Summary of computational data

2-H:

B3LYP/cc-pVDZ

Reactant HF = -998.0577637 au = -626291.227299387 Kcal/mol  
Freq = 77.3923 bowl depth = 1.334 Å  
Product HF = -998.0577636 au = -626291.227236636 Kcal/mol  
Freq = 77.4648 bowl depth = 1.334 Å  
TS HF = -998.0484708 au = -626285.395911708 Kcal/mol  
Freq = -66.4910  
 $\Delta G = 5.831324928$  Kcal/mol

M06-2X/cc-pVDZ

Reactant HF = -997.7225698 au = -626080.889775198 Kcal/mol  
Freq = 77.8425 bowl depth = 1.384 Å  
Product HF = -997.7225698 au = -626080.889775198 Kcal/mol  
Freq = 77.8425 bowl depth = 1.384 Å  
TS HF = -997.7115511 au = -626073.975430761 Kcal/mol  
Freq = -70.7027  
QST3 HF = -997.7115515 au = -626073.975430761 Kcal/mol  
Freq = -70.7027  
 $\Delta G = 6.914344437$  Kcal/mol

2-*i*Pr :

B3LYP/cc-pVDZ

Reactant HF = -1116.0016101 au = -700302.170353851 Kcal/mol  
Freq = 28.5353 bowl depth = 1.358 and 1.360 Å  
Product HF = -1116.0019844 au = -700302.405230844 Kcal/mol  
Freq = 28.4303 bowl depth = 1.354 and 1.359 Å  
QST3 HF = -1115.9920573 au = -700296.175876323 Kcal/mol  
Freq = -60.9805  
 $\Delta G^1 = 5.994477528$  Kcal/mol

$$\Delta G^2 = 6.229354521 \text{ Kcal/mol}$$

M062X/cc-pVDZ

Reactant HF = -1115.6103753 au = -700056.666604503 Kcal/mol  
Freq = 19.6767 bowl depth = 1.408 and 1.413 Å  
Product HF = -1115.6108527 au = -700056.966177777 Kcal/mol  
Freq = 34.0495 bowl depth = 1.408 and 1.409 Å  
TS HF = -1115.5992004 au = -700049.654243004 Kcal/mol  
Freq = -64.0132  
QST3 HF = -1115.5992004 au = -700049.654243004 Kcal/mol  
Freq = -64.0090

$$\Delta G^1 = 7.012361499 \text{ Kcal/mol}$$

$$\Delta G^2 = 7.311934773 \text{ Kcal/mol}$$

**9-H:**

B3LYP/cc-pVDZ

Reactant HF = -768.1950128 au = -482050.052482128 Kcal/mol  
Freq = 140.3729 bowl depth = 0.874 Å  
Product HF = -768.1950209 au = -482050.057564959 Kcal/mol  
Freq = 140.5197 bowl depth = 0.874 Å  
TS HF = -768.1804884 au = -482040.938275884 Kcal/mol  
Freq = -108.2674  
QST3 HF = -768.1804951 au = -482040.942480201 Kcal/mol  
Freq = -107.6895

$$\Delta G^1 = 9.119289075 \text{ Kcal/mol}$$

$$\Delta G^2 = 9.110001927 \text{ Kcal/mol}$$

M062X/cc-pVDZ

Reactant HF = -767.9319213 au = -481884.959934963 Kcal/mol  
Freq = 138.2912 bowl depth = 0.886 Å  
Product HF = -767.9319514 au = -481884.978823014 Kcal/mol  
Freq = 139.0536 bowl depth = 0.886 Å  
TS HF = -767.916182 au = -481875.08336682 Kcal/mol  
Freq = -111.1554

$$\Delta G^1 = 9.876568143 \text{ Kcal/mol}$$

$$\Delta G^2 = 9.895456194 \text{ Kcal/mol}$$

## 10

### B3LYP/cc-pVDZ

Reactant HF = -807.4761593 au = -506699.364722343 Kcal/mol

Freq = 130.6002 bowl depth = 1.142 Å

Product HF = -807.4761407 au = -506699.353050657 Kcal/mol

Freq = 130.5313 bowl depth = 1.142 Å

QST2 HF = -807.4471558 au = -506681.164736058 eV

Freq = -120.6124

$\Delta G^1 = 18.199986285$  Kcal/mol

$\Delta G^2 = 18.188314599$  Kcal/mol

### M062X/cc-pVDZ

Reactant HF = -807.200978 au = -506526.68570478 Kcal/mol

Freq = 129.9096 bowl depth = 1.156 Å

Product HF = -807.200872 au = -506526.61918872 Kcal/mol

Freq = 129.5655 bowl depth = 1.156 Å

## B.2. Cartesian coordinates

### Compound 2-H:

2-H-reactant

#p b3lyp/cc-pVDZ opt freq=noraman

HF = -998.0577637

0 1

|   |             |             |            |
|---|-------------|-------------|------------|
| C | 1.39604200  | -1.16619900 | 0.54190300 |
| C | 0.74943500  | -2.39628000 | 0.27795200 |
| C | -0.74950200 | -2.39625900 | 0.27795500 |
| C | -1.39607500 | -1.16616000 | 0.54190900 |
| C | -0.67018200 | 0.00001000  | 0.85369400 |



|   |             |             |             |
|---|-------------|-------------|-------------|
| C | 0.67018200  | -0.00000900 | 0.85369200  |
| C | 1.39607400  | 1.16616000  | 0.54190300  |
| C | 0.74950200  | 2.39625900  | 0.27795300  |
| C | -0.74943400 | 2.39628000  | 0.27795100  |
| C | -1.39604200 | 1.16619900  | 0.54190500  |
| C | 2.70562300  | -0.76132500 | 0.14402100  |
| C | 2.70564600  | 0.76125000  | 0.14402600  |
| C | -2.70564500 | -0.76125100 | 0.14402900  |
| C | -2.70562200 | 0.76132500  | 0.14402200  |
| C | -1.63213000 | 3.39277800  | -0.21390300 |
| C | -2.97134000 | 3.07881800  | -0.48025400 |
| C | -3.51865000 | 1.77221600  | -0.35944300 |
| C | -1.63222600 | -3.39273300 | -0.21389600 |
| C | -2.97142800 | -3.07873700 | -0.48024400 |
| C | -3.51870200 | -1.77212000 | -0.35943200 |
| C | 1.63213000  | -3.39277900 | -0.21390100 |
| C | 2.97133800  | -3.07882000 | -0.48025300 |
| C | 3.51864900  | -1.77221700 | -0.35944500 |
| C | 3.51870300  | 1.77212100  | -0.35943000 |
| C | 2.97142800  | 3.07873900  | -0.48024000 |
| C | 1.63222700  | 3.39273500  | -0.21389600 |
| H | -1.27271000 | 4.39907700  | -0.44142900 |
| H | -3.61635900 | 3.86961400  | -0.87091900 |
| H | -4.53641400 | 1.58563800  | -0.71053600 |
| H | -1.27283500 | -4.39904300 | -0.44142100 |
| H | -3.61646900 | -3.86951500 | -0.87090800 |
| H | -4.53646000 | -1.58551400 | -0.71052800 |
| H | 1.27270700  | -4.39907900 | -0.44141900 |
| H | 3.61635900  | -3.86961500 | -0.87091800 |
| H | 4.53641200  | -1.58564400 | -0.71054200 |
| H | 4.53646200  | 1.58551900  | -0.71052500 |
| H | 3.61647200  | 3.86951600  | -0.87090300 |
| H | 1.27283400  | 4.39904400  | -0.44141800 |

2-H-product

#p b3lyp/cc-pVDZ opt freq=noraman

HF = -998.0577636

0 1

|   |             |             |             |
|---|-------------|-------------|-------------|
| C | -1.39623700 | -1.16606900 | 0.54184600  |
| C | -0.74962300 | -2.39626600 | 0.27792300  |
| C | 0.74923000  | -2.39638800 | 0.27792700  |
| C | 1.39605100  | -1.16630500 | 0.54186900  |
| C | 0.67026600  | -0.00005500 | 0.85351600  |
| C | -0.67026700 | 0.00005600  | 0.85352000  |
| C | -1.39605300 | 1.16630600  | 0.54187600  |
| C | -0.74923100 | 2.39639000  | 0.27793600  |
| C | 0.74962200  | 2.39626800  | 0.27792600  |
| C | 1.39623700  | 1.16606900  | 0.54183900  |
| C | -2.70580200 | -0.76101400 | 0.14401000  |
| C | -2.70567600 | 0.76145700  | 0.14401800  |
| C | 2.70568000  | -0.76145900 | 0.14402800  |
| C | 2.70579800  | 0.76101100  | 0.14399700  |
| C | 1.63262800  | 3.39274700  | -0.21381000 |
| C | 2.97174100  | 3.07864700  | -0.48006300 |
| C | 3.51890900  | 1.77183900  | -0.35949100 |
| C | 1.63206100  | -3.39300300 | -0.21385200 |
| C | 2.97121900  | -3.07911300 | -0.48013400 |
| C | 3.51861000  | -1.77240500 | -0.35951400 |
| C | -1.63262800 | -3.39274400 | -0.21381700 |
| C | -2.97174200 | -3.07864500 | -0.48006700 |
| C | -3.51891400 | -1.77184000 | -0.35947700 |
| C | -3.51860400 | 1.77240200  | -0.35953300 |
| C | -2.97121800 | 3.07911300  | -0.48013300 |
| C | -1.63205800 | 3.39300000  | -0.21385600 |
| H | 1.27319700  | 4.39904700  | -0.44134200 |
| H | 3.61704300  | 3.86931300  | -0.87052200 |
| H | 4.53664900  | 1.58543400  | -0.71073000 |
| H | 1.27246000  | -4.39923900 | -0.44140000 |
| H | 3.61637500  | -3.86987000 | -0.87065400 |
| H | 4.53636200  | -1.58614600 | -0.71079500 |
| H | -1.27319500 | -4.39904300 | -0.44135200 |
| H | -3.61704200 | -3.86930800 | -0.87053600 |
| H | -4.53665200 | -1.58543200 | -0.71071700 |
| H | -4.53636000 | 1.58614700  | -0.71080100 |
| H | -3.61637700 | 3.86987400  | -0.87063600 |

H -1.27245500 4.39923200 -0.44141600

## 2-H-TS

#p b3lyp/cc-pVDZ opt=(calcfc,ts,noeigen) freq scfcyc=1000

HF = -998.0484708

0 1

|   |             |             |             |
|---|-------------|-------------|-------------|
| C | -1.40043000 | -1.16876900 | -0.00028700 |
| C | -0.75972200 | -2.43025900 | -0.00014500 |
| C | 0.75972100  | -2.43025900 | -0.00014600 |
| C | 1.40042900  | -1.16877000 | -0.00029200 |
| C | 0.65851500  | -0.00000100 | -0.00047100 |
| C | -0.65851600 | 0.00000000  | -0.00046700 |
| C | -1.40042900 | 1.16876900  | -0.00028700 |
| C | -0.75971900 | 2.43025900  | -0.00014500 |
| C | 0.75972100  | 2.43025900  | -0.00014600 |
| C | 1.40043000  | 1.16876800  | -0.00029200 |
| C | -2.77091200 | -0.77674400 | -0.00007200 |
| C | -2.77091100 | 0.77674600  | -0.00007300 |
| C | 2.77091100  | -0.77674500 | -0.00007700 |
| C | 2.77091100  | 0.77674200  | -0.00007800 |
| C | 1.71665400  | 3.47936800  | 0.00012200  |
| C | 3.09067800  | 3.17428900  | 0.00025400  |
| C | 3.64862900  | 1.86001600  | 0.00018700  |
| C | 1.71665400  | -3.47936900 | 0.00012200  |
| C | 3.09067600  | -3.17429000 | 0.00025500  |
| C | 3.64862700  | -1.86001700 | 0.00018900  |
| C | -1.71665500 | -3.47936900 | 0.00011700  |
| C | -3.09067900 | -3.17428900 | 0.00025000  |
| C | -3.64862900 | -1.86001500 | 0.00018900  |
| C | -3.64862700 | 1.86001800  | 0.00018800  |
| C | -3.09067600 | 3.17429100  | 0.00025100  |
| C | -1.71665200 | 3.47937000  | 0.00011800  |
| H | 1.41512900  | 4.52976100  | 0.00026100  |
| H | 3.79111800  | 4.01316600  | 0.00047200  |
| H | 4.73572600  | 1.74923700  | 0.00037900  |
| H | 1.41512800  | -4.52976200 | 0.00026000  |
| H | 3.79111700  | -4.01316700 | 0.00047200  |

|   |             |             |            |
|---|-------------|-------------|------------|
| H | 4.73572500  | -1.74923900 | 0.00038100 |
| H | -1.41513000 | -4.52976200 | 0.00025000 |
| H | -3.79112000 | -4.01316500 | 0.00046300 |
| H | -4.73572700 | -1.74923700 | 0.00038200 |
| H | -4.73572500 | 1.74924100  | 0.00037800 |
| H | -3.79111500 | 4.01316900  | 0.00046700 |
| H | -1.41512600 | 4.52976200  | 0.00025400 |

## 2-H-reactant

#p M062X/cc-pVDZ opt freq=noraman

HF = -997.7225698

0 1

|   |             |             |             |
|---|-------------|-------------|-------------|
| C | -1.39293300 | 1.16615400  | 0.56225900  |
| C | -0.74736700 | 2.38574000  | 0.29035900  |
| C | 0.74746000  | 2.38571200  | 0.29036200  |
| C | 1.39297800  | 1.16610000  | 0.56226200  |
| C | 0.66741900  | -0.00001300 | 0.88348700  |
| C | -0.66741900 | 0.00001300  | 0.88348700  |
| C | -1.39297800 | -1.16610000 | 0.56226200  |
| C | -0.74745900 | -2.38571200 | 0.29036200  |
| C | 0.74736700  | -2.38574000 | 0.29035900  |
| C | 1.39293300  | -1.16615400 | 0.56225900  |
| C | -2.69284200 | 0.76018300  | 0.15378000  |
| C | -2.69287300 | -0.76008000 | 0.15378700  |
| C | 2.69287300  | 0.76008000  | 0.15378700  |
| C | 2.69284200  | -0.76018300 | 0.15378000  |
| C | 1.61839400  | -3.37583100 | -0.22366000 |
| C | 2.94932100  | -3.06191300 | -0.50030200 |
| C | 3.49635100  | -1.75911400 | -0.37234400 |
| C | 1.61852500  | 3.37577000  | -0.22365100 |
| C | 2.94944200  | 3.06180200  | -0.50028800 |
| C | 3.49642300  | 1.75898300  | -0.37232800 |
| C | -1.61839400 | 3.37583100  | -0.22366000 |
| C | -2.94932100 | 3.06191300  | -0.50030200 |
| C | -3.49635100 | 1.75911400  | -0.37234300 |
| C | -3.49642300 | -1.75898300 | -0.37232800 |
| C | -2.94944200 | -3.06180200 | -0.50028800 |

|   |             |             |             |
|---|-------------|-------------|-------------|
| C | -1.61852500 | -3.37577000 | -0.22365100 |
| H | 1.25175400  | -4.37621900 | -0.46081700 |
| H | 3.58765500  | -3.84564500 | -0.91090500 |
| H | 4.50564600  | -1.56551900 | -0.73946900 |
| H | 1.25192500  | 4.37617300  | -0.46080800 |
| H | 3.58780700  | 3.84551100  | -0.91088800 |
| H | 4.50571100  | 1.56534900  | -0.73945300 |
| H | -1.25175500 | 4.37621900  | -0.46081700 |
| H | -3.58765500 | 3.84564500  | -0.91090500 |
| H | -4.50564700 | 1.56551800  | -0.73946800 |
| H | -4.50571100 | -1.56534900 | -0.73945200 |
| H | -3.58780700 | -3.84551100 | -0.91088800 |
| H | -1.25192500 | -4.37617300 | -0.46080800 |

## 2-H-product

#p M062X/cc-pVDZ opt freq=noraman

HF = -997.7225698

0 1

|   |             |             |             |
|---|-------------|-------------|-------------|
| C | -1.39291200 | -1.16618000 | 0.56226000  |
| C | -0.74732700 | -2.38575500 | 0.29035900  |
| C | 0.74750900  | -2.38569900 | 0.29036400  |
| C | 1.39300100  | -1.16607400 | 0.56226200  |
| C | 0.66741900  | 0.00002500  | 0.88349100  |
| C | -0.66741900 | -0.00002600 | 0.88349100  |
| C | -1.39300100 | 1.16607400  | 0.56226600  |
| C | -0.74750900 | 2.38570000  | 0.29037600  |
| C | 0.74732700  | 2.38575600  | 0.29037100  |
| C | 1.39291300  | 1.16617900  | 0.56226400  |
| C | -2.69282600 | -0.76023500 | 0.15377500  |
| C | -2.69288300 | 0.76003200  | 0.15377800  |
| C | 2.69288600  | -0.76003300 | 0.15378600  |
| C | 2.69282300  | 0.76023400  | 0.15376800  |
| C | 1.61832700  | 3.37586600  | -0.22364400 |
| C | 2.94925800  | 3.06197000  | -0.50031000 |
| C | 3.49630400  | 1.75918000  | -0.37237800 |
| C | 1.61858900  | -3.37574500 | -0.22363700 |
| C | 2.94950300  | -3.06175200 | -0.50027800 |

|   |             |             |             |
|---|-------------|-------------|-------------|
| C | 3.49645300  | -1.75892300 | -0.37233300 |
| C | -1.61832900 | -3.37586400 | -0.22365400 |
| C | -2.94926400 | -3.06197000 | -0.50030600 |
| C | -3.49631100 | -1.75918200 | -0.37236100 |
| C | -3.49644500 | 1.75892100  | -0.37235000 |
| C | -2.94949800 | 3.06175300  | -0.50028200 |
| C | -1.61858700 | 3.37574700  | -0.22362700 |
| H | 1.25167100  | 4.37624800  | -0.46080100 |
| H | 3.58756800  | 3.84571900  | -0.91092000 |
| H | 4.50560000  | 1.56559300  | -0.73950700 |
| H | 1.25201200  | -4.37615600 | -0.46079400 |
| H | 3.58787600  | -3.84545400 | -0.91087900 |
| H | 4.50573600  | -1.56526000 | -0.73945700 |
| H | -1.25167400 | -4.37624600 | -0.46081300 |
| H | -3.58757500 | -3.84571800 | -0.91091500 |
| H | -4.50560800 | -1.56559400 | -0.73948700 |
| H | -4.50572800 | 1.56526000  | -0.73947600 |
| H | -3.58786900 | 3.84545500  | -0.91088400 |
| H | -1.25200900 | 4.37615800  | -0.46078100 |

**2-H-TS**

#p M062X/cc-pVDZ opt=(calcfc,ts,noeigen) freq scfcyc=1000

HF = -997.7115511

0 1

|   |             |             |             |
|---|-------------|-------------|-------------|
| C | -1.40027800 | 1.16867400  | 0.00004900  |
| C | -0.75976200 | 2.43030500  | -0.00018300 |
| C | 0.75984100  | 2.43038700  | 0.00001500  |
| C | 1.40045800  | 1.16879300  | -0.00039000 |
| C | 0.65861600  | -0.00000100 | -0.00053100 |
| C | -0.65841200 | 0.00000000  | -0.00019400 |
| C | -1.40028300 | -1.16867100 | 0.00004800  |
| C | -0.75977000 | -2.43030300 | -0.00018300 |
| C | 0.75983300  | -2.43038900 | 0.00001400  |
| C | 1.40045400  | -1.16879700 | -0.00039100 |
| C | -2.77081100 | 0.77683700  | 0.00009100  |
| C | -2.77081500 | -0.77682800 | 0.00009100  |
| C | 2.77102000  | 0.77691700  | -0.00005100 |

Supplementary Material (ESI) for *Chemical Communications*

This journal is (c) The Royal Society of Chemistry 2010

|   |             |             |             |
|---|-------------|-------------|-------------|
| C | 2.77101800  | -0.77692500 | -0.00005200 |
| C | 1.71665000  | -3.47956200 | 0.00018600  |
| C | 3.09066300  | -3.17458000 | 0.00022900  |
| C | 3.64863900  | -1.86036000 | 0.00005400  |
| C | 1.71666000  | 3.47955700  | 0.00018800  |
| C | 3.09067200  | 3.17457100  | 0.00023100  |
| C | 3.64864400  | 1.86035000  | 0.00005500  |
| C | -1.71679800 | 3.47933900  | -0.00003900 |
| C | -3.09085800 | 3.17418900  | 0.00008300  |
| C | -3.64874200 | 1.85992200  | 0.00013900  |
| C | -3.64874800 | -1.85991200 | 0.00014200  |
| C | -3.09086700 | -3.17418100 | 0.00008600  |
| C | -1.71680800 | -3.47933500 | -0.00003800 |
| H | 1.41504600  | -4.52993200 | 0.00036800  |
| H | 3.79105600  | -4.01349500 | 0.00043500  |
| H | 4.73574300  | -1.74968300 | 0.00022900  |
| H | 1.41505900  | 4.52992800  | 0.00037100  |
| H | 3.79106700  | 4.01348400  | 0.00043800  |
| H | 4.73574800  | 1.74967000  | 0.00023100  |
| H | -1.41535400 | 4.52975500  | -0.00016000 |
| H | -3.79131500 | 4.01305600  | 0.00007700  |
| H | -4.73582400 | 1.74902800  | 0.00010200  |
| H | -4.73583000 | -1.74901500 | 0.00010800  |
| H | -3.79132700 | -4.01304500 | 0.00008200  |
| H | -1.41536800 | -4.52975100 | -0.00015800 |

**2-H-QST3**

#p M062X/cc-pVDZ opt=qst3 freq scfcyc=1000

HF = -997.7115515

0 1

|   |             |             |             |
|---|-------------|-------------|-------------|
| C | 1.39761200  | -1.16922500 | 0.00000700  |
| C | 0.75780800  | -2.42237200 | -0.00015700 |
| C | -0.75781100 | -2.42236900 | -0.00027400 |
| C | -1.39761600 | -1.16922300 | -0.00016200 |
| C | -0.65540300 | 0.00000000  | -0.00013600 |
| C | 0.65540100  | 0.00000000  | 0.00003200  |
| C | 1.39761200  | 1.16922500  | 0.00000400  |

|   |             |             |             |
|---|-------------|-------------|-------------|
| C | 0.75780900  | 2.42237200  | -0.00016200 |
| C | -0.75781000 | 2.42236900  | -0.00027100 |
| C | -1.39761600 | 1.16922300  | -0.00016100 |
| C | 2.76236700  | -0.77601000 | 0.00017800  |
| C | 2.76236700  | 0.77600900  | 0.00017300  |
| C | -2.76237300 | -0.77600800 | 0.00006000  |
| C | -2.76237300 | 0.77600900  | 0.00006700  |
| C | -1.71083400 | 3.46985500  | -0.00040100 |
| C | -3.07936800 | 3.16582700  | 0.00009700  |
| C | -3.63711200 | 1.85494500  | 0.00058800  |
| C | -1.71083400 | -3.46985400 | -0.00041100 |
| C | -3.07936900 | -3.16582700 | 0.00008000  |
| C | -3.63711200 | -1.85494400 | 0.00057200  |
| C | 1.71083800  | -3.46985200 | -0.00044400 |
| C | 3.07937200  | -3.16582200 | -0.00002200 |
| C | 3.63711500  | -1.85493700 | 0.00049900  |
| C | 3.63711500  | 1.85493600  | 0.00048500  |
| C | 3.07937200  | 3.16582200  | -0.00003800 |
| C | 1.71083900  | 3.46985200  | -0.00045500 |
| H | -1.40849400 | 4.51879000  | -0.00044800 |
| H | -3.77804000 | 4.00392200  | 0.00027100  |
| H | -4.72253800 | 1.74397700  | 0.00089500  |
| H | -1.40849400 | -4.51878900 | -0.00046000 |
| H | -3.77804000 | -4.00392200 | 0.00024800  |
| H | -4.72253800 | -1.74397700 | 0.00087500  |
| H | 1.40850900  | -4.51879100 | -0.00062300 |
| H | 3.77803700  | -4.00392300 | 0.00001400  |
| H | 4.72253900  | -1.74396200 | 0.00070100  |
| H | 4.72253900  | 1.74396200  | 0.00068600  |
| H | 3.77803700  | 4.00392200  | -0.00000600 |
| H | 1.40851000  | 4.51879000  | -0.00063600 |

Compound **2**-*i*Pr:

**2**-*i*Pr-reactant



#p b3lyp/cc-pVDZ opt freq=norman

HF = -1116.0016101

0 1

|   |             |             |             |
|---|-------------|-------------|-------------|
| C | -0.94638700 | 0.35640900  | -0.78410400 |
| C | -1.50407200 | -0.92369600 | -0.56584200 |
| C | -0.55130900 | -2.07960200 | -0.49183700 |
| C | 0.82633000  | -1.79299300 | -0.63995100 |
| C | 1.28828500  | -0.48900700 | -0.90873300 |
| C | 0.43608600  | 0.54383700  | -0.97680800 |
| C | 0.84031700  | 1.84387600  | -0.61371200 |
| C | 2.17089900  | 2.12792800  | -0.22689600 |
| C | 3.12467100  | 0.97399800  | -0.15384300 |
| C | 2.61605500  | -0.30645200 | -0.47498800 |
| C | -1.50462200 | 1.61336900  | -0.41403700 |
| C | -0.33880400 | 2.58732800  | -0.30432000 |
| C | 1.93423500  | -2.54562100 | -0.14604100 |
| C | 3.10225700  | -1.57555900 | -0.03871200 |
| C | 4.40566300  | 0.92618700  | 0.45502100  |
| C | 4.99326000  | -0.30723300 | 0.76554100  |
| C | 4.34955700  | -1.56090400 | 0.57834100  |
| C | -0.79716900 | -3.39587900 | -0.02245900 |
| C | 0.27135400  | -4.22947400 | 0.33330500  |
| C | 1.63194100  | -3.81794400 | 0.32976100  |
| C | -2.86642100 | -0.88334300 | -0.17874100 |
| C | -3.52672000 | 0.33829800  | 0.05376100  |
| C | -2.83659800 | 1.58588200  | -0.01329400 |
| C | -0.12615100 | 3.85110600  | 0.23773500  |
| C | 1.21284900  | 4.26309200  | 0.48076900  |
| C | 2.32929100  | 3.43664500  | 0.29905100  |
| H | 4.92773000  | 1.84319100  | 0.73814700  |
| H | 5.97494100  | -0.30244600 | 1.24545600  |
| H | 4.82144300  | -2.46629300 | 0.96760700  |
| H | -1.81735300 | -3.76032200 | 0.11894300  |
| H | 0.04049500  | -5.23159800 | 0.70274800  |
| H | 2.39189600  | -4.48373000 | 0.74587100  |
| H | -3.41060100 | -1.81416200 | -0.00222400 |
| C | -4.99921100 | 0.33987700  | 0.46363800  |
| H | -3.36212800 | 2.49055800  | 0.30484400  |

|   |             |             |             |
|---|-------------|-------------|-------------|
| H | -0.94807100 | 4.50915700  | 0.52995100  |
| H | 1.37361400  | 5.25882300  | 0.90121100  |
| H | 3.30922400  | 3.79875500  | 0.61877000  |
| C | -5.90298400 | -0.19605600 | -0.66134800 |
| C | -5.24481400 | -0.41604000 | 1.78171300  |
| H | -5.01690800 | -1.49040000 | 1.68181100  |
| H | -4.61958100 | -0.01563500 | 2.59534600  |
| H | -6.30092100 | -0.32977800 | 2.08674200  |
| H | -5.68893300 | -1.25657700 | -0.87563600 |
| H | -5.75678700 | 0.36917400  | -1.59533500 |
| H | -6.96584900 | -0.12058700 | -0.37731300 |
| H | -5.27894300 | 1.39369900  | 0.63525300  |

### 2-*i*Pr-product

#p b3lyp/cc-pVDZ opt freq=noraman

HF = -1116.0019844

0 1

|   |             |             |             |
|---|-------------|-------------|-------------|
| C | 1.11294200  | -1.77135900 | -0.61603100 |
| C | -0.20579400 | -2.26395600 | -0.47035000 |
| C | -1.32285700 | -1.26984700 | -0.56849200 |
| C | -0.96748400 | 0.07607200  | -0.80313600 |
| C | 0.37036000  | 0.47158500  | -0.99266200 |
| C | 1.37111800  | -0.41680500 | -0.90467500 |
| C | 2.65190200  | -0.02542200 | -0.46706500 |
| C | 2.95459000  | 1.32268600  | -0.16321200 |
| C | 1.83548500  | 2.31500900  | -0.25984400 |
| C | 0.56709300  | 1.82392200  | -0.64848100 |
| C | 2.31926100  | -2.33710000 | -0.10335200 |
| C | 3.32358800  | -1.19760500 | -0.00594300 |
| C | -1.71636700 | 1.23881400  | -0.45531700 |
| C | -0.71422000 | 2.38193600  | -0.35614100 |
| C | 1.78711100  | 3.64025900  | 0.24558000  |
| C | 0.55575800  | 4.28795800  | 0.40916300  |
| C | -0.70213100 | 3.67108000  | 0.16716200  |
| C | -2.68198300 | -1.43058500 | -0.19196600 |
| C | -3.52161300 | -0.32348500 | 0.01967800  |
| C | -3.02923900 | 1.01701500  | -0.05970800 |
| C | -0.25052800 | -3.59510000 | 0.01987400  |

|   |             |             |             |
|---|-------------|-------------|-------------|
| C | 0.93032900  | -4.24855900 | 0.39551000  |
| C | 2.21184700  | -3.63287300 | 0.39242000  |
| C | 4.54747400  | -0.98145600 | 0.62014100  |
| C | 4.98906100  | 0.35897700  | 0.79099300  |
| C | 4.22194300  | 1.48216100  | 0.45500500  |
| H | 2.69743500  | 4.15371800  | 0.56375800  |
| H | 0.55877900  | 5.30290400  | 0.81403900  |
| H | -1.61737600 | 4.19912500  | 0.44556100  |
| H | -3.08949300 | -2.42811800 | -0.00711900 |
| C | -4.97506300 | -0.56068900 | 0.42462500  |
| H | -3.67996900 | 1.84082100  | 0.24336200  |
| H | -1.20395700 | -4.10952500 | 0.16117100  |
| H | 0.85329300  | -5.26820700 | 0.78080700  |
| H | 3.06145300  | -4.16720200 | 0.82441900  |
| H | 5.14869900  | -1.79734000 | 1.02858300  |
| H | 5.95338200  | 0.52224200  | 1.27828700  |
| H | 4.59392600  | 2.47301400  | 0.72605800  |
| C | -5.27743200 | -0.04339700 | 1.84268500  |
| C | -5.95716700 | 0.02957200  | -0.60326400 |
| H | -5.12739900 | -1.65368900 | 0.43535800  |
| H | -5.16912700 | 1.05224800  | 1.90680500  |
| H | -4.59772200 | -0.49112500 | 2.58485600  |
| H | -6.31227700 | -0.28986000 | 2.13294400  |
| H | -5.76701700 | -0.36918800 | -1.61221700 |
| H | -5.87256700 | 1.12805400  | -0.65621600 |
| H | -6.99797800 | -0.21071400 | -0.32964800 |

**2-*i*Pr-QST3**

#p b3lyp/cc-pVDZ opt=qst3 freq scfcyc=1000

HF= -1115.9920573

0 1

|   |             |             |             |
|---|-------------|-------------|-------------|
| C | -0.94638700 | 0.35640900  | -0.78410400 |
| C | -1.50407200 | -0.92369600 | -0.56584200 |
| C | -0.55130900 | -2.07960200 | -0.49183700 |
| C | 0.82633000  | -1.79299300 | -0.63995100 |
| C | 1.28828500  | -0.48900700 | -0.90873300 |
| C | 0.43608600  | 0.54383700  | -0.97680800 |

Supplementary Material (ESI) for *Chemical Communications*

This journal is (c) The Royal Society of Chemistry 2010

|   |             |             |             |
|---|-------------|-------------|-------------|
| C | 0.84031700  | 1.84387600  | -0.61371200 |
| C | 2.17089900  | 2.12792800  | -0.22689600 |
| C | 3.12467100  | 0.97399800  | -0.15384300 |
| C | 2.61605500  | -0.30645200 | -0.47498800 |
| C | -1.50462200 | 1.61336900  | -0.41403700 |
| C | -0.33880400 | 2.58732800  | -0.30432000 |
| C | 1.93423500  | -2.54562100 | -0.14604100 |
| C | 3.10225700  | -1.57555900 | -0.03871200 |
| C | 4.40566300  | 0.92618700  | 0.45502100  |
| C | 4.99326000  | -0.30723300 | 0.76554100  |
| C | 4.34955700  | -1.56090400 | 0.57834100  |
| C | -0.79716900 | -3.39587900 | -0.02245900 |
| C | 0.27135400  | -4.22947400 | 0.33330500  |
| C | 1.63194100  | -3.81794400 | 0.32976100  |
| C | -2.86642100 | -0.88334300 | -0.17874100 |
| C | -3.52672000 | 0.33829800  | 0.05376100  |
| C | -2.83659800 | 1.58588200  | -0.01329400 |
| C | -0.12615100 | 3.85110600  | 0.23773500  |
| C | 1.21284900  | 4.26309200  | 0.48076900  |
| C | 2.32929100  | 3.43664500  | 0.29905100  |
| H | 4.92773000  | 1.84319100  | 0.73814700  |
| H | 5.97494100  | -0.30244600 | 1.24545600  |
| H | 4.82144300  | -2.46629300 | 0.96760700  |
| H | -1.81735300 | -3.76032200 | 0.11894300  |
| H | 0.04049500  | -5.23159800 | 0.70274800  |
| H | 2.39189600  | -4.48373000 | 0.74587100  |
| H | -3.41060100 | -1.81416200 | -0.00222400 |
| C | -4.99921100 | 0.33987700  | 0.46363800  |
| H | -3.36212800 | 2.49055800  | 0.30484400  |
| H | -0.94807100 | 4.50915700  | 0.52995100  |
| H | 1.37361400  | 5.25882300  | 0.90121100  |
| H | 3.30922400  | 3.79875500  | 0.61877000  |
| C | -5.90298400 | -0.19605600 | -0.66134800 |
| C | -5.24481400 | -0.41604000 | 1.78171300  |
| H | -5.01690800 | -1.49040000 | 1.68181100  |
| H | -4.61958100 | -0.01563500 | 2.59534600  |
| H | -6.30092100 | -0.32977800 | 2.08674200  |
| H | -5.68893300 | -1.25657700 | -0.87563600 |
| H | -5.75678700 | 0.36917400  | -1.59533500 |

|   |             |             |             |
|---|-------------|-------------|-------------|
| H | -6.96584900 | -0.12058700 | -0.37731300 |
| H | -5.27894300 | 1.39369900  | 0.63525300  |

**2-*i*Pr-reactant**

#p M062X/cc-pVDZ opt freq=noraman

HF= -1115.6103753

0 1

|   |             |             |             |
|---|-------------|-------------|-------------|
| C | -0.94471200 | 0.36433000  | -0.81904400 |
| C | -1.50476200 | -0.90598700 | -0.59541100 |
| C | -0.56208900 | -2.06399400 | -0.51696500 |
| C | 0.80993200  | -1.79139600 | -0.66639800 |
| C | 1.28242200  | -0.49058900 | -0.94224000 |
| C | 0.44057900  | 0.54331300  | -1.01436000 |
| C | 0.85098400  | 1.84002800  | -0.63950100 |
| C | 2.17176100  | 2.10971900  | -0.23826700 |
| C | 3.11496600  | 0.95308900  | -0.16090000 |
| C | 2.60765900  | -0.31634500 | -0.49200300 |
| C | -1.48997500 | 1.61782900  | -0.43902600 |
| C | -0.32029900 | 2.58230000  | -0.32315500 |
| C | 1.90365900  | -2.54265400 | -0.15555900 |
| C | 3.07526400  | -1.58129300 | -0.04186100 |
| C | 4.37721500  | 0.90171500  | 0.47692300  |
| C | 4.94862900  | -0.32858200 | 0.80234800  |
| C | 4.30099600  | -1.57513200 | 0.60467600  |
| C | -0.82319100 | -3.36514000 | -0.02656200 |
| C | 0.23155300  | -4.19932800 | 0.34524900  |
| C | 1.59208700  | -3.79805600 | 0.34179700  |
| C | -2.85708700 | -0.86178700 | -0.18989800 |
| C | -3.50298600 | 0.35829200  | 0.05185100  |
| C | -2.81055700 | 1.59896700  | -0.01902400 |
| C | -0.10810500 | 3.82832300  | 0.24474300  |
| C | 1.22806700  | 4.22949800  | 0.50233100  |
| C | 2.33556500  | 3.40298100  | 0.31356000  |
| H | 4.89383600  | 1.81709900  | 0.77128000  |
| H | 5.91497900  | -0.32845900 | 1.30895700  |
| H | 4.75036200  | -2.48218500 | 1.01227000  |
| H | -1.84732400 | -3.71368500 | 0.11871800  |

|   |             |             |             |
|---|-------------|-------------|-------------|
| H | -0.00867200 | -5.19037300 | 0.73334800  |
| H | 2.34454100  | -4.45761300 | 0.77723000  |
| H | -3.40327700 | -1.78987200 | -0.00340600 |
| C | -4.96079300 | 0.35819100  | 0.48659700  |
| H | -3.32454400 | 2.50377100  | 0.31431900  |
| H | -0.93013500 | 4.47822600  | 0.54920000  |
| H | 1.38994800  | 5.21296200  | 0.94618000  |
| H | 3.31489500  | 3.74852300  | 0.64938500  |
| C | -5.86761600 | -0.19660000 | -0.61588000 |
| C | -5.16688300 | -0.40150300 | 1.80042400  |
| H | -4.93123900 | -1.47042200 | 1.67927100  |
| H | -4.52191600 | -0.00163900 | 2.59586100  |
| H | -6.21431500 | -0.32669100 | 2.12940000  |
| H | -5.63397300 | -1.25407500 | -0.81641600 |
| H | -5.73785400 | 0.36022900  | -1.55486100 |
| H | -6.92496200 | -0.13588600 | -0.31691100 |
| H | -5.24403200 | 1.40895700  | 0.65951400  |

**2-*i*Pr-product**

#p M062X/cc-pVDZ opt freq=noraman

HF= -1115.6108527

0 1

|   |             |             |             |
|---|-------------|-------------|-------------|
| C | 1.11068300  | -1.77016300 | -0.64035200 |
| C | -0.20114400 | -2.25787800 | -0.49370200 |
| C | -1.31611300 | -1.26884700 | -0.59669100 |
| C | -0.96700000 | 0.06974400  | -0.83534400 |
| C | 0.37130000  | 0.46753200  | -1.02736400 |
| C | 1.36928100  | -0.41544000 | -0.93658400 |
| C | 2.64588000  | -0.02199300 | -0.48355600 |
| C | 2.93826500  | 1.31834100  | -0.17150100 |
| C | 1.82137600  | 2.30597400  | -0.27328300 |
| C | 0.56378500  | 1.81981500  | -0.67346900 |
| C | 2.30696900  | -2.32650300 | -0.10960200 |
| C | 3.30746500  | -1.18681400 | -0.00709800 |
| C | -1.71234600 | 1.22648100  | -0.47884900 |
| C | -0.71367200 | 2.36885500  | -0.37479500 |
| C | 1.77143100  | 3.61841800  | 0.25351700  |

Supplementary Material (ESI) for *Chemical Communications*

This journal is (c) The Royal Society of Chemistry 2010

|   |             |             |             |
|---|-------------|-------------|-------------|
| C | 0.54390900  | 4.25896500  | 0.42387900  |
| C | -0.70852500 | 3.64227300  | 0.17110000  |
| C | -2.66644800 | -1.43522300 | -0.20462600 |
| C | -3.49971600 | -0.33433900 | 0.01490200  |
| C | -3.01382200 | 1.00450100  | -0.06690300 |
| C | -0.25320300 | -3.57626600 | 0.01825800  |
| C | 0.91887200  | -4.22221400 | 0.41154700  |
| C | 2.19701800  | -3.60692200 | 0.40919900  |
| C | 4.50945700  | -0.97101300 | 0.64827700  |
| C | 4.94566200  | 0.36663800  | 0.82696600  |
| C | 4.18617400  | 1.48294200  | 0.47479700  |
| H | 2.68055600  | 4.12457500  | 0.58346900  |
| H | 0.54319700  | 5.26443700  | 0.84751900  |
| H | -1.62573300 | 4.15746800  | 0.46127700  |
| H | -3.06899100 | -2.43320100 | -0.01397000 |
| C | -4.93964700 | -0.56384100 | 0.44413300  |
| H | -3.66102900 | 1.82551000  | 0.25051400  |
| H | -1.20950300 | -4.08200300 | 0.16334200  |
| H | 0.83735700  | -5.23169600 | 0.81726700  |
| H | 3.04152700  | -4.12740700 | 0.86392500  |
| H | 5.09528000  | -1.78595800 | 1.07686000  |
| H | 5.89533000  | 0.53164900  | 1.33794100  |
| H | 4.54424500  | 2.47492100  | 0.75623300  |
| C | -5.19906000 | -0.04237500 | 1.86084800  |
| C | -5.92285300 | 0.05177400  | -0.55603700 |
| H | -5.10316800 | -1.65331200 | 0.45158400  |
| H | -5.07729100 | 1.05107800  | 1.90841700  |
| H | -4.50256300 | -0.49185200 | 2.58291600  |
| H | -6.22734600 | -0.27653300 | 2.17510000  |
| H | -5.75408300 | -0.33956200 | -1.56938400 |
| H | -5.81074300 | 1.14682100  | -0.59344900 |
| H | -6.96091100 | -0.16947800 | -0.26557300 |

**2-*i*Pr-TS**

#p M062X/cc-pVDZ opt=(calcfc,ts,noeigen) freq scfeyc=1000

HF = -1115.5992004

0 1

|   |             |             |             |
|---|-------------|-------------|-------------|
| C | -1.10919300 | -1.76799700 | -0.00003000 |
| C | 0.19440200  | -2.29986300 | -0.00002600 |
| C | 1.34271000  | -1.31019600 | -0.00003900 |
| C | 1.00668500  | 0.05316300  | -0.00006800 |
| C | -0.31675100 | 0.45609300  | -0.00008000 |
| C | -1.31058400 | -0.39822400 | -0.00005400 |
| C | -2.63538200 | 0.00367600  | -0.00002400 |
| C | -2.96699200 | 1.37150900  | -0.00001700 |
| C | -1.81697500 | 2.36007000  | -0.00002800 |
| C | -0.51474800 | 1.82682400  | -0.00006000 |
| C | -2.40004900 | -2.36074300 | 0.00000700  |
| C | -3.41292400 | -1.18469300 | 0.00000900  |
| C | 1.78862300  | 1.23759800  | -0.00003700 |
| C | 0.77724600  | 2.41693400  | -0.00003500 |
| C | -1.77615300 | 3.77591500  | 0.00001200  |
| C | -0.53978100 | 4.43634000  | 0.00002400  |
| C | 0.73764400  | 3.80529200  | 0.00000600  |
| C | 2.74976700  | -1.47969000 | 0.00000100  |
| C | 3.61090900  | -0.36909600 | 0.00002700  |
| C | 3.15236700  | 0.98896700  | 0.00001400  |
| C | 0.15520000  | -3.71576300 | 0.00000800  |
| C | -1.08007200 | -4.37819300 | 0.00003500  |
| C | -2.35840800 | -3.74907800 | 0.00003800  |
| C | -4.77980200 | -0.93669100 | 0.00004500  |
| C | -5.21185600 | 0.42100300  | 0.00004500  |
| C | -4.37272500 | 1.54424200  | 0.00001600  |
| H | -2.68849600 | 4.37510900  | 0.00003800  |
| H | -0.55504900 | 5.52737600  | 0.00005900  |
| H | 1.63301500  | 4.42878400  | 0.00003200  |
| H | 3.19795300  | -2.47633300 | 0.00002600  |
| C | 5.11358500  | -0.61155200 | 0.00006200  |
| H | 3.89316300  | 1.79201600  | 0.00005300  |
| H | 1.06848200  | -4.31355600 | 0.00001600  |
| H | -1.06315400 | -5.46920400 | 0.00006200  |
| H | -3.25296700 | -4.37373100 | 0.00006900  |
| H | -5.53073500 | -1.72864100 | 0.00007800  |
| H | -6.28821600 | 0.59996300  | 0.00007400  |
| H | -4.82711300 | 2.53692800  | 0.00002100  |
| C | 5.77533800  | -0.04969400 | -1.26207300 |



|   |            |             |             |
|---|------------|-------------|-------------|
| C | 5.77533600 | -0.04948200 | 1.26210300  |
| H | 5.26395500 | -1.70281500 | 0.00015300  |
| H | 5.67221700 | 1.04583700  | -1.30830600 |
| H | 5.31966100 | -0.47020200 | -2.16991000 |
| H | 6.85044700 | -0.28399100 | -1.27107800 |
| H | 5.31960400 | -0.46977000 | 2.17001300  |
| H | 5.67230400 | 1.04606600  | 1.30812000  |
| H | 6.85042700 | -0.28385500 | 1.27118600  |

### 2-*i*Pr-QST3

#p M062X/cc-pVDZ opt=qst3 freq scfcyc=1000

HF= -1115.5992004

0 1

|   |             |             |             |
|---|-------------|-------------|-------------|
| C | -1.10920000 | -1.76799800 | 0.00010200  |
| C | 0.19438500  | -2.29988000 | 0.00003700  |
| C | 1.34271300  | -1.31020400 | 0.00002200  |
| C | 1.00668300  | 0.05315700  | 0.00010800  |
| C | -0.31675500 | 0.45609500  | 0.00022500  |
| C | -1.31059200 | -0.39822100 | 0.00021000  |
| C | -2.63538600 | 0.00368800  | 0.00015700  |
| C | -2.96699200 | 1.37151700  | 0.00012500  |
| C | -1.81697400 | 2.36007400  | 0.00008200  |
| C | -0.51475400 | 1.82682600  | 0.00017900  |
| C | -2.40006600 | -2.36072900 | -0.00001400 |
| C | -3.41293400 | -1.18468600 | 0.00002200  |
| C | 1.78861400  | 1.23759600  | 0.00003900  |
| C | 0.77725100  | 2.41693300  | 0.00008100  |
| C | -1.77614100 | 3.77592500  | -0.00011000 |
| C | -0.53977300 | 4.43634100  | -0.00015200 |
| C | 0.73765600  | 3.80528600  | -0.00007100 |
| C | 2.74977100  | -1.47967900 | -0.00008200 |
| C | 3.61091500  | -0.36906600 | -0.00010100 |
| C | 3.15236300  | 0.98897900  | -0.00005300 |
| C | 0.15516600  | -3.71578500 | -0.00007600 |
| C | -1.08011400 | -4.37819700 | -0.00015800 |
| C | -2.35844200 | -3.74906000 | -0.00014500 |
| C | -4.77980600 | -0.93668400 | -0.00011100 |

|   |             |             |             |
|---|-------------|-------------|-------------|
| C | -5.21185900 | 0.42101700  | -0.00007800 |
| C | -4.37273100 | 1.54424900  | 0.00003800  |
| H | -2.68848500 | 4.37511700  | -0.00018600 |
| H | -0.55502800 | 5.52737600  | -0.00027800 |
| H | 1.63302600  | 4.42878000  | -0.00017600 |
| H | 3.19797300  | -2.47631400 | -0.00013100 |
| C | 5.11359900  | -0.61149200 | -0.00013300 |
| H | 3.89315100  | 1.79203800  | -0.00009100 |
| H | 1.06844200  | -4.31358700 | -0.00013400 |
| H | -1.06330300 | -5.46920900 | -0.00023100 |
| H | -3.25300900 | -4.37370100 | -0.00021200 |
| H | -5.53074500 | -1.72862900 | -0.00022900 |
| H | -6.28821900 | 0.59997200  | -0.00018300 |
| H | -4.82711000 | 2.53693800  | -0.00001300 |
| C | 5.77546200  | -0.04932900 | -1.26209100 |
| C | 5.77530700  | -0.04992800 | 1.26220500  |
| H | 5.26398800  | -1.70274800 | -0.00047700 |
| H | 5.67156100  | 1.04610500  | -1.30868500 |
| H | 5.32056000  | -0.47042200 | -2.17004300 |
| H | 6.85075400  | -0.28282800 | -1.27029400 |
| H | 5.31970900  | -0.47083200 | 2.16989300  |
| H | 5.67207800  | 1.04557400  | 1.30883000  |
| H | 6.85044700  | -0.28409000 | 1.27110400  |

### Compound 9:

#### 9-H-reactant

#p b3lyp/cc-pVDZ opt freq=noraman

HF= -768.1950128

0 1

|   |             |             |            |
|---|-------------|-------------|------------|
| C | -1.20724700 | -0.01539300 | 0.61921300 |
| C | -0.35840300 | -1.15288000 | 0.61908700 |
| C | 0.98583400  | -0.69722400 | 0.61916300 |
| C | 0.96775000  | 0.72204500  | 0.61939100 |
| C | -0.38763800 | 1.14344400  | 0.61933600 |
| C | -2.49179300 | -0.03169900 | 0.09527800 |

|   |             |             |             |
|---|-------------|-------------|-------------|
| C | -2.97627500 | -1.35255600 | -0.25418700 |
| C | -2.14397600 | -2.46785700 | -0.25433700 |
| C | -0.73983900 | -2.37948500 | 0.09502200  |
| C | 0.36664900  | -3.24838100 | -0.25439500 |
| C | 1.68463400  | -2.80161700 | -0.25444200 |
| C | 2.03454000  | -1.43893200 | 0.09493800  |
| C | 1.99705800  | 1.49016000  | 0.09488700  |
| C | 3.18504100  | 0.73646500  | -0.25439600 |
| C | 3.20286600  | -0.65508000 | -0.25437800 |
| C | -3.00972500 | 1.27637900  | -0.25414400 |
| C | -2.20598100 | 2.41246600  | -0.25441800 |
| C | -0.80007700 | 2.35983500  | 0.09502100  |
| C | 0.28385600  | 3.25680000  | -0.25429000 |
| C | 1.61272200  | 2.84350200  | -0.25460800 |
| H | -4.00136100 | -1.47010300 | -0.61669200 |
| H | -2.54845100 | -3.41706000 | -0.61687800 |
| H | 0.16162600  | -4.25972000 | -0.61660700 |
| H | 2.46235000  | -3.47985300 | -0.61659800 |
| H | 4.10143400  | -1.16252400 | -0.61642800 |
| H | -4.03753300 | 1.36776700  | -0.61646100 |
| H | -2.63449800 | 3.35112700  | -0.61679700 |
| H | 0.05311600  | 4.26259200  | -0.61643900 |
| H | 4.07027200  | 1.26678900  | -0.61652600 |
| H | 2.37306800  | 3.54103500  | -0.61699900 |

### 9-H-product

#p b3lyp/cc-pVDZ opt freq=noraman  
HF= -768.1950209

0 1

|   |             |             |             |
|---|-------------|-------------|-------------|
| C | -0.28574400 | 1.17297700  | 0.61962600  |
| C | -1.20406600 | 0.09061500  | 0.61988100  |
| C | -0.45821700 | -1.11708300 | 0.61983200  |
| C | 0.92090700  | -0.78109200 | 0.61972700  |
| C | 1.02741500  | 0.63435900  | 0.61946500  |
| C | -0.58993300 | 2.42093900  | 0.09529900  |
| C | -1.98565400 | 2.59662700  | -0.25459700 |
| C | -2.88600200 | 1.53545900  | -0.25438700 |

|   |             |             |             |
|---|-------------|-------------|-------------|
| C | -2.48497400 | 0.18706900  | 0.09552000  |
| C | -3.08360200 | -1.08613200 | -0.25391100 |
| C | -2.35208700 | -2.27003300 | -0.25463000 |
| C | -0.94565200 | -2.30503100 | 0.09474800  |
| C | 1.90031000  | -1.61191500 | 0.09504600  |
| C | 1.43222100  | -2.93851000 | -0.25477700 |
| C | 0.08012200  | -3.26781700 | -0.25476700 |
| C | 0.56852600  | 3.21911100  | -0.25451200 |
| C | 1.85601800  | 2.69096500  | -0.25496600 |
| C | 2.12024200  | 1.30921900  | 0.09484600  |
| C | 3.23735300  | 0.45403500  | -0.25435300 |
| C | 3.13278500  | -0.93365800 | -0.25459600 |
| H | -2.32986800 | 3.56907700  | -0.61778100 |
| H | -3.90158400 | 1.71663000  | -0.61744100 |
| H | -4.11512900 | -1.11326400 | -0.61616800 |
| H | -2.83808800 | -3.18022100 | -0.61709700 |
| H | -0.21303200 | -4.25719800 | -0.61702000 |
| H | 0.42689100  | 4.24105600  | -0.61733600 |
| H | 2.67441700  | 3.31911900  | -0.61781400 |
| H | 4.16582400  | 0.90444200  | -0.61645500 |
| H | 2.14748200  | -3.68222900 | -0.61708900 |
| H | 3.98328700  | -1.51803400 | -0.61675500 |

**9-H-TS**

#p b3lyp/cc-pVDZ opt=(calcfc,ts,noeigen) freq scfcyc=1000

HF = -768.1804884

0 1

|   |             |             |             |
|---|-------------|-------------|-------------|
| C | -1.09490300 | 0.46831100  | -0.00000100 |
| C | 0.10709800  | 1.18606600  | -0.00000100 |
| C | 1.16110800  | 0.26465400  | 0.00000000  |
| C | 0.61050800  | -1.02247800 | 0.00000000  |
| C | -0.78376900 | -0.89664100 | 0.00000000  |
| C | -2.35427700 | 1.00692700  | -0.00000200 |
| C | -2.29373600 | 2.46974600  | -0.00000300 |
| C | -1.08648100 | 3.19068600  | -0.00000400 |
| C | 0.23011800  | 2.55028000  | -0.00000200 |
| C | 1.64012100  | 2.94470000  | -0.00000300 |

Supplementary Material (ESI) for *Chemical Communications*

This journal is (c) The Royal Society of Chemistry 2010

|   |             |             |             |
|---|-------------|-------------|-------------|
| C | 2.69877600  | 2.01927100  | -0.00000100 |
| C | 2.49657300  | 0.56916500  | 0.00000000  |
| C | 1.31282400  | -2.19847100 | 0.00000200  |
| C | 2.75443200  | -1.94267600 | 0.00000300  |
| C | 3.30748000  | -0.64987500 | 0.00000200  |
| C | -3.37030400 | -0.04726800 | -0.00000200 |
| C | -3.05777000 | -1.41821600 | 0.00000000  |
| C | -1.68525400 | -1.92793600 | 0.00000200  |
| C | -0.99650600 | -3.21994700 | 0.00000400  |
| C | 0.40396100  | -3.34628700 | 0.00000400  |
| H | -3.21959300 | 3.05154500  | -0.00000200 |
| H | -1.15973400 | 4.28171700  | -0.00000300 |
| H | 1.90750200  | 4.00497700  | -0.00000400 |
| H | 3.71383500  | 2.42592600  | 0.00000000  |
| H | 4.39850100  | -0.57653500 | 0.00000500  |
| H | -4.43050300 | 0.22043800  | -0.00000400 |
| H | -3.89728800 | -2.11889000 | 0.00000200  |
| H | -1.57855800 | -4.14564400 | 0.00000900  |
| H | 3.45488900  | -2.78238400 | 0.00000600  |
| H | 0.81095200  | -4.36121900 | 0.00000700  |

**9-H-QST3**

#p b3lyp/cc-pVDZ opt=qst3 freq scfcyc=1000

HF= -768.1804951

0 1

|   |             |             |             |
|---|-------------|-------------|-------------|
| C | 0.50361600  | -1.07914200 | -0.00008400 |
| C | -0.87070900 | -0.81247800 | 0.00009600  |
| C | -1.04175600 | 0.57698100  | 0.00001700  |
| C | 0.22685700  | 1.16906500  | -0.00015400 |
| C | 1.18197300  | 0.14552300  | -0.00023800 |
| C | 1.08306300  | -2.32044000 | 0.00000100  |
| C | 0.06242300  | -3.37014200 | 0.00019700  |
| C | -1.31819300 | -3.10230600 | 0.00029400  |
| C | -1.87224200 | -1.74708800 | 0.00027500  |
| C | -3.18601100 | -1.10080200 | 0.00047400  |
| C | -3.35784400 | 0.29501200  | 0.00037300  |
| C | -2.24009800 | 1.24068300  | 0.00003100  |

|   |             |             |             |
|---|-------------|-------------|-------------|
| C | 0.48773100  | 2.51389100  | -0.00012900 |
| C | -0.75708900 | 3.28461900  | -0.00007200 |
| C | -2.03143800 | 2.68981000  | 0.00006400  |
| C | 2.54314700  | -2.21228900 | -0.00020500 |
| C | 3.22458000  | -0.98208800 | -0.00035600 |
| C | 2.54161400  | 0.31293000  | -0.00025500 |
| C | 2.88993800  | 1.73502600  | -0.00022900 |
| C | 1.93044200  | 2.76323200  | -0.00019700 |
| H | 0.36433100  | -4.42113700 | 0.00006000  |
| H | -1.99119100 | -3.96417000 | 0.00025600  |
| H | -4.09229600 | -1.71267900 | 0.00057100  |
| H | -4.38544900 | 0.66885100  | 0.00051300  |
| H | -2.89344800 | 3.36262000  | 0.00031200  |
| H | 3.15482700  | -3.11871200 | -0.00028600 |
| H | 4.31743500  | -1.01982700 | -0.00047000 |
| H | 3.94100400  | 2.03667000  | -0.00018700 |
| H | -0.71922500 | 4.37746300  | -0.00005200 |
| H | 2.30398600  | 3.79093900  | -0.00013400 |

**9-H-reactant**

#p M062X/cc-pVDZ opt freq=noraman

HF= -767.9319213

0 1

|   |             |             |             |
|---|-------------|-------------|-------------|
| C | 0.17624800  | 1.19340800  | 0.62772700  |
| C | -1.08059500 | 0.53629900  | 0.62794700  |
| C | -0.84406300 | -0.86215500 | 0.62808800  |
| C | 0.55896800  | -1.06928300 | 0.62800400  |
| C | 1.18956100  | 0.20114500  | 0.62786600  |
| C | 0.36239300  | 2.45386400  | 0.09742800  |
| C | -0.86112900 | 3.14094400  | -0.25856900 |
| C | -2.08748700 | 2.49979500  | -0.25828900 |
| C | -2.22179600 | 1.10300900  | 0.09766300  |
| C | -3.25334600 | 0.15174100  | -0.25816100 |
| C | -3.02259800 | -1.21277600 | -0.25818100 |
| C | -1.73560500 | -1.77221000 | 0.09753300  |
| C | 1.14915600  | -2.19821200 | 0.09743200  |
| C | 0.21945700  | -3.24940000 | -0.25856300 |

|   |             |             |             |
|---|-------------|-------------|-------------|
| C | -1.14957400 | -3.04717100 | -0.25861500 |
| C | 1.73237000  | 2.75782900  | -0.25832100 |
| C | 2.72114800  | 1.78957600  | -0.25833700 |
| C | 2.44578400  | 0.41363700  | 0.09762200  |
| C | 3.15833900  | -0.79531000 | -0.25803600 |
| C | 2.54291700  | -2.03484000 | -0.25840000 |
| H | -0.81110500 | 4.16773600  | -0.62745600 |
| H | -2.95998900 | 3.04449400  | -0.62570200 |
| H | -4.21448200 | 0.51706400  | -0.62648600 |
| H | -3.81058600 | -1.87383500 | -0.62553400 |
| H | -1.79416200 | -3.84818300 | -0.62709100 |
| H | 1.98115300  | 3.75586600  | -0.62570900 |
| H | 3.71333500  | 2.05941400  | -0.62669400 |
| H | 4.18443000  | -0.72376300 | -0.62528600 |
| H | 0.60452400  | -4.20295600 | -0.62633700 |
| H | 3.10597700  | -2.89516900 | -0.62674300 |

### 9-H-product

#p M062X/cc-pVDZ opt freq=noraman

HF= -767.9319514

0 1

|   |             |             |             |
|---|-------------|-------------|-------------|
| C | 1.20588500  | -0.04279900 | 0.62797800  |
| C | 0.41307800  | 1.13337900  | 0.62783200  |
| C | -0.95025200 | 0.74313600  | 0.62757300  |
| C | -1.00054300 | -0.67412300 | 0.62795000  |
| C | 0.33210700  | -1.16007500 | 0.62805700  |
| C | 2.47910600  | -0.08773100 | 0.09766500  |
| C | 3.02598700  | 1.20460500  | -0.25822600 |
| C | 2.25261600  | 2.35221700  | -0.25803100 |
| C | 0.84948100  | 2.33050800  | 0.09773200  |
| C | -0.21048900 | 3.24994800  | -0.25851600 |
| C | -1.54095800 | 2.86919500  | -0.25856500 |
| C | -1.95400500 | 1.52816100  | 0.09747300  |
| C | -2.05718500 | -1.38605900 | 0.09773000  |
| C | -3.20507600 | -0.57889500 | -0.25809500 |
| C | -3.15615700 | 0.80415500  | -0.25812700 |
| C | 2.93331000  | -1.41544800 | -0.25821900 |

Supplementary Material (ESI) for *Chemical Communications*

This journal is (c) The Royal Society of Chemistry 2010

|   |             |             |             |
|---|-------------|-------------|-------------|
| C | 2.08062300  | -2.50560500 | -0.25845200 |
| C | 0.68259800  | -2.38482000 | 0.09755800  |
| C | -0.43988300 | -3.22693200 | -0.25851300 |
| C | -1.74005700 | -2.75296400 | -0.25826100 |
| H | 4.05208000  | 1.26887000  | -0.62674500 |
| H | 2.69726800  | 3.27915000  | -0.62663000 |
| H | 0.04574300  | 4.24572700  | -0.62693400 |
| H | -2.28512300 | 3.57870500  | -0.62694500 |
| H | -4.02443100 | 1.35537500  | -0.62587500 |
| H | 3.95244400  | -1.55192600 | -0.62649000 |
| H | 2.45847200  | -3.46169500 | -0.62721400 |
| H | -0.25500000 | -4.23809400 | -0.62742100 |
| H | -4.11013600 | -1.06754300 | -0.62564900 |
| H | -2.53243900 | -3.40769200 | -0.62736500 |

**9-H-TS**

#p M062X/cc-pVDZ opt=(calcfc,ts,noeigen) freq scfcyc=1000

HF = -767.916182

0 1

|   |             |             |             |
|---|-------------|-------------|-------------|
| C | -0.25299700 | -1.16285100 | -0.00009100 |
| C | 1.02793100  | -0.60017800 | -0.00009400 |
| C | 0.88876400  | 0.79184100  | -0.00008400 |
| C | -0.47836700 | 1.08968100  | -0.00006600 |
| C | -1.18399100 | -0.11850100 | -0.00007800 |
| C | -0.54344000 | -2.49502600 | -0.00000900 |
| C | 0.68286900  | -3.29204900 | 0.00003300  |
| C | 1.96279000  | -2.72985700 | 0.00003100  |
| C | 2.20504300  | -1.28767100 | -0.00001400 |
| C | 3.34236400  | -0.36787100 | 0.00004700  |
| C | 3.20328000  | 1.02318900  | 0.00003600  |
| C | 1.90632000  | 1.69925700  | -0.00001400 |
| C | -1.02729900 | 2.33789600  | 0.00000600  |
| C | 0.01642300  | 3.36222700  | 0.00004200  |
| C | 1.38249900  | 3.06478500  | 0.00003100  |
| C | -1.98994700 | -2.71035300 | 0.00005200  |
| C | -2.92016100 | -1.66686900 | 0.00004000  |
| C | -2.54078400 | -0.25433000 | -0.00001900 |



|   |             |             |            |
|---|-------------|-------------|------------|
| C | -3.19303800 | 1.05467200  | 0.00002300 |
| C | -2.48801900 | 2.26191600  | 0.00003700 |
| H | 0.62008500  | -4.38221000 | 0.00003100 |
| H | 2.80805600  | -3.42091300 | 0.00004400 |
| H | 4.35967400  | -0.76489400 | 0.00009400 |
| H | 4.12170300  | 1.61362300  | 0.00005200 |
| H | 2.07354100  | 3.91006300  | 0.00004000 |
| H | -2.38632300 | -3.72794700 | 0.00010900 |
| H | -3.97648800 | -1.94319400 | 0.00005800 |
| H | -4.28325500 | 1.11696600  | 0.00000800 |
| H | -0.26035300 | 4.41847700  | 0.00005700 |
| H | -3.07808300 | 3.18057200  | 0.00005200 |

### Compound 10:

#### 10-reactant

#p b3lyp/cc-pVDZ opt freq=noraman

HF= -807.4761593

0 1

|   |             |             |             |
|---|-------------|-------------|-------------|
| C | 0.47360000  | 1.33074600  | -0.69528400 |
| C | 1.39397700  | 0.22907600  | -0.69565700 |
| C | 0.91574500  | -1.07543100 | -0.69562600 |
| C | -0.49854300 | -1.32155300 | -0.69580400 |
| C | -1.38930900 | -0.25530000 | -0.69576900 |
| C | -0.89516700 | 1.09262200  | -0.69554300 |
| C | 2.59537900  | 0.58620100  | -0.06814600 |
| C | 3.36141800  | -0.46897100 | 0.44696400  |
| C | 2.86845400  | -1.81437600 | 0.44650700  |
| C | 1.60186200  | -2.12441700 | -0.06842800 |
| C | 1.03888300  | 2.44942100  | -0.06782000 |
| C | 0.13708800  | 3.39106800  | 0.44741800  |
| C | -1.27464200 | 3.14560300  | 0.44688700  |
| C | -1.80527500 | 1.95459500  | -0.06831300 |
| C | 2.53460500  | 2.11705800  | 0.18799600  |
| C | -2.64078400 | -0.32498200 | -0.06857400 |
| C | -3.00554300 | -1.57692400 | 0.44636600  |

|   |             |             |             |
|---|-------------|-------------|-------------|
| C | -2.08697300 | -2.67664500 | 0.44628500  |
| C | -0.79008600 | -2.54068000 | -0.06868300 |
| C | 0.56616800  | -3.25354800 | 0.18741900  |
| C | -3.10079500 | 1.13649500  | 0.18718400  |
| H | 4.29713300  | -0.27458800 | 0.97873600  |
| H | 3.45694300  | -2.56765700 | 0.97790800  |
| H | 0.49513400  | 4.27709200  | 0.97930600  |
| H | -1.91096600 | 3.85863000  | 0.97869000  |
| H | 3.20350200  | 2.67597500  | -0.49055800 |
| H | 2.83800500  | 2.37020800  | 1.21578300  |
| H | -3.95210100 | -1.70996100 | 0.97782100  |
| H | -2.38664600 | -3.58450600 | 0.97743600  |
| H | 0.63362000  | -3.64199800 | 1.21554000  |
| H | 0.71592100  | -4.11281900 | -0.49044600 |
| H | -3.91907400 | 1.43667200  | -0.49144400 |
| H | -3.47184500 | 1.27260000  | 1.21496100  |

### 10-product

#p b3lyp/cc-pVDZ opt freq=noraman  
HF= -807.4761407

0 1

|   |             |             |             |
|---|-------------|-------------|-------------|
| C | 1.40523300  | -0.14371200 | -0.69517800 |
| C | 0.80521800  | 1.16037700  | -0.69544500 |
| C | -0.57822300 | 1.28841400  | -0.69518500 |
| C | -1.40782800 | 0.11692400  | -0.69523900 |
| C | -0.82707700 | -1.14522100 | -0.69504200 |
| C | 0.60230900  | -1.27753700 | -0.69508100 |
| C | 1.64355200  | 2.09244800  | -0.06860900 |
| C | 1.01949900  | 3.23749900  | 0.44615500  |
| C | -0.40723100 | 3.36962500  | 0.44630000  |
| C | -1.23093400 | 2.35866100  | -0.06839700 |
| C | 2.65849100  | -0.11325600 | -0.06847100 |
| C | 3.12198800  | -1.33214500 | 0.44641600  |
| C | 2.29399800  | -2.50161000 | 0.44640700  |
| C | 0.99028200  | -2.46957800 | -0.06824100 |
| C | 3.00030900  | 1.38039900  | 0.18707100  |
| C | -1.42729600 | -2.24560600 | -0.06801200 |

|   |             |             |             |
|---|-------------|-------------|-------------|
| C | -2.71462500 | -2.03743000 | 0.44684100  |
| C | -3.31353700 | -0.73567500 | 0.44680100  |
| C | -2.63410200 | 0.37726300  | -0.06837000 |
| C | -2.69545100 | 1.90830500  | 0.18733100  |
| C | -0.30469200 | -3.28838100 | 0.18793300  |
| H | 1.59684400  | 3.99932300  | 0.97758200  |
| H | -0.83495300 | 4.22449800  | 0.97766700  |
| H | 4.07613800  | -1.38928700 | 0.97786400  |
| H | 2.66509200  | -3.38251900 | 0.97782600  |
| H | 3.35987300  | 1.54595200  | 1.21461500  |
| H | 3.79184300  | 1.74484000  | -0.49182800 |
| H | -3.24122200 | -2.83513600 | 0.97833100  |
| H | -4.26188300 | -0.61654000 | 0.97835900  |
| H | -3.40679200 | 2.41211900  | -0.49120700 |
| H | -3.01805300 | 2.13654600  | 1.21513000  |
| H | -0.34088200 | -3.68162800 | 1.21583900  |
| H | -0.38529500 | -4.15675700 | -0.49007700 |

## 10-QST2

#p b3lyp/cc-pVDZ opt=qst3 freq scfcyc=1000

HF= -807.4471558

0 1

|   |             |             |             |
|---|-------------|-------------|-------------|
| C | -1.34594700 | 0.32673100  | 0.00017500  |
| C | -0.37168600 | 1.33417900  | 0.00017000  |
| C | 0.95597900  | 1.00220100  | -0.00002600 |
| C | 1.34136300  | -0.34521400 | -0.00018100 |
| C | 0.38995800  | -1.32894200 | -0.00016300 |
| C | -0.96969500 | -0.98901700 | -0.00000900 |
| C | -0.88750100 | 2.61258900  | 0.00030800  |
| C | 0.14655100  | 3.58646700  | 0.00022000  |
| C | 1.55885500  | 3.23335900  | 0.00001000  |
| C | 2.01279900  | 1.88740100  | -0.00011900 |
| C | -2.64092800 | 0.79946900  | 0.00042500  |
| C | -3.57964400 | -0.26666900 | 0.00036100  |
| C | -3.17933800 | -1.66632100 | 0.00005700  |
| C | -1.81889000 | -2.07495600 | -0.00006900 |
| C | -2.46810400 | 2.38673300  | 0.00056600  |

|   |             |             |             |
|---|-------------|-------------|-------------|
| C | 0.62814300  | -2.68673800 | -0.00029200 |
| C | 2.02076600  | -2.96664100 | -0.00045200 |
| C | 3.03276500  | -1.92018200 | -0.00043300 |
| C | 2.70641900  | -0.53773600 | -0.00029600 |
| C | 3.30100000  | 0.94410400  | -0.00021800 |
| C | -0.83286700 | -3.33079800 | -0.00018600 |
| H | -0.07620800 | 4.65721400  | 0.00041100  |
| H | 2.25925400  | 4.07333700  | 0.00007800  |
| H | -4.65727700 | -0.08008800 | 0.00043300  |
| H | -3.99531000 | -2.39455000 | 0.00012700  |
| H | -2.94105100 | 2.84402200  | -0.88346900 |
| H | -2.94061300 | 2.84370800  | 0.88500800  |
| H | 2.39787100  | -3.99324000 | -0.00049300 |
| H | 4.07139700  | -2.26279000 | -0.00055400 |
| H | 3.93326900  | 1.12491400  | 0.88403600  |
| H | 3.93326500  | 1.12505200  | -0.88442600 |
| H | -0.99239400 | -3.96891800 | -0.88433800 |
| H | -0.99219700 | -3.96878400 | 0.88408900  |

**10-reactant**

#p M062X/cc-pVDZ opt freq=noraman

HF= -807.200978

0 1

|   |             |             |             |
|---|-------------|-------------|-------------|
| C | 0.81574100  | -1.15043900 | -0.70367100 |
| C | -0.61623400 | -1.26848700 | -0.70337500 |
| C | -1.40425800 | -0.13131800 | -0.70360600 |
| C | -0.79037900 | 1.16769100  | -0.70326200 |
| C | 0.58844500  | 1.28142700  | -0.70323900 |
| C | 1.40687400  | 0.10057600  | -0.70374800 |
| C | -1.01001300 | -2.44926300 | -0.06800500 |
| C | -2.30673200 | -2.46592500 | 0.45214900  |
| C | -3.11971100 | -1.29276100 | 0.45181700  |
| C | -2.64832300 | -0.08485600 | -0.06873700 |
| C | 1.39758000  | -2.25075400 | -0.06855600 |
| C | 2.67946800  | -2.05493600 | 0.45192600  |
| C | 3.28925800  | -0.76448400 | 0.45188400  |
| C | 2.62645500  | 0.34998000  | -0.06876400 |

Supplementary Material (ESI) for *Chemical Communications*

This journal is (c) The Royal Society of Chemistry 2010

|   |             |             |             |
|---|-------------|-------------|-------------|
| C | 0.27038900  | -3.27796200 | 0.18843700  |
| C | 1.25033300  | 2.33542400  | -0.06768300 |
| C | 0.44001500  | 3.34742800  | 0.45304700  |
| C | -0.98240600 | 3.23030800  | 0.45274000  |
| C | -1.61605500 | 2.09925400  | -0.06810600 |
| C | -2.97447900 | 1.40524300  | 0.18678300  |
| C | 2.70412800  | 1.87342700  | 0.18685500  |
| H | -2.67978200 | -3.33828300 | 0.99297900  |
| H | -4.06738500 | -1.33497400 | 0.99288500  |
| H | 3.18992000  | -2.85426700 | 0.99350200  |
| H | 4.23073400  | -0.65085400 | 0.99347800  |
| H | 0.34171300  | -4.14366500 | -0.48908600 |
| H | 0.30223200  | -3.66235200 | 1.21737600  |
| H | 0.87730500  | 4.18911900  | 0.99421400  |
| H | -1.55182700 | 3.98926900  | 0.99347300  |
| H | -3.32583100 | 1.57093200  | 1.21471300  |
| H | -3.75779600 | 1.77583100  | -0.49350700 |
| H | 3.41574600  | 2.36729400  | -0.49382800 |
| H | 3.02439900  | 2.09451800  | 1.21449700  |

**10-product**

#p M062X/cc-pVDZ opt freq=noraman

HF= -807.200872

0 1

|   |             |             |             |
|---|-------------|-------------|-------------|
| C | -0.76375600 | -1.18540700 | -0.70314700 |
| C | 0.67188000  | -1.23987800 | -0.70360600 |
| C | 1.40854500  | -0.06866200 | -0.70398200 |
| C | 0.73785900  | 1.20199800  | -0.70418700 |
| C | -0.64483000 | 1.25438900  | -0.70419400 |
| C | -1.40974600 | 0.03807600  | -0.70367300 |
| C | 1.11776400  | -2.40181000 | -0.06806800 |
| C | 2.41375200  | -2.36115400 | 0.45269700  |
| C | 3.17353500  | -1.15311600 | 0.45215500  |
| C | 2.64912500  | 0.03250600  | -0.06879300 |
| C | -1.29635600 | -2.31044600 | -0.06755200 |
| C | -2.58575400 | -2.17162200 | 0.45243100  |
| C | -3.25211100 | -0.90946300 | 0.45146100  |

|   |             |             |             |
|---|-------------|-------------|-------------|
| C | -2.63919700 | 0.23317200  | -0.06886300 |
| C | -0.12442700 | -3.28696900 | 0.18768300  |
| C | -1.35285300 | 2.27797300  | -0.06890700 |
| C | -0.58794500 | 3.32469200  | 0.45271800  |
| C | 0.83812200  | 3.27022400  | 0.45329600  |
| C | 1.52141000  | 2.16867600  | -0.06823400 |
| C | 2.90901800  | 1.53553000  | 0.18701400  |
| C | -2.78422800 | 1.75138000  | 0.18779700  |
| H | 2.82386500  | -3.21580900 | 0.99495300  |
| H | 4.12242800  | -1.15268600 | 0.99277500  |
| H | -3.06009000 | -2.99303200 | 0.99358900  |
| H | -4.19873600 | -0.83764900 | 0.99130000  |
| H | -0.13915100 | -3.67529700 | 1.21554400  |
| H | -0.15716300 | -4.15289500 | -0.49259100 |
| H | -1.06184700 | 4.14619000  | 0.99435000  |
| H | 1.37301600  | 4.05246600  | 0.99611700  |
| H | 3.67521700  | 1.94058500  | -0.49315000 |
| H | 3.25283500  | 1.71665600  | 1.21482900  |
| H | -3.10953800 | 1.95646100  | 1.21720500  |
| H | -3.51968600 | 2.21448700  | -0.48920700 |

### C. NMR spectra and VT-NMR Experiments

$^1\text{H}$ -NMR spectrum of alkyne **8** (300 MHz,  $\text{CDCl}_3$ ):

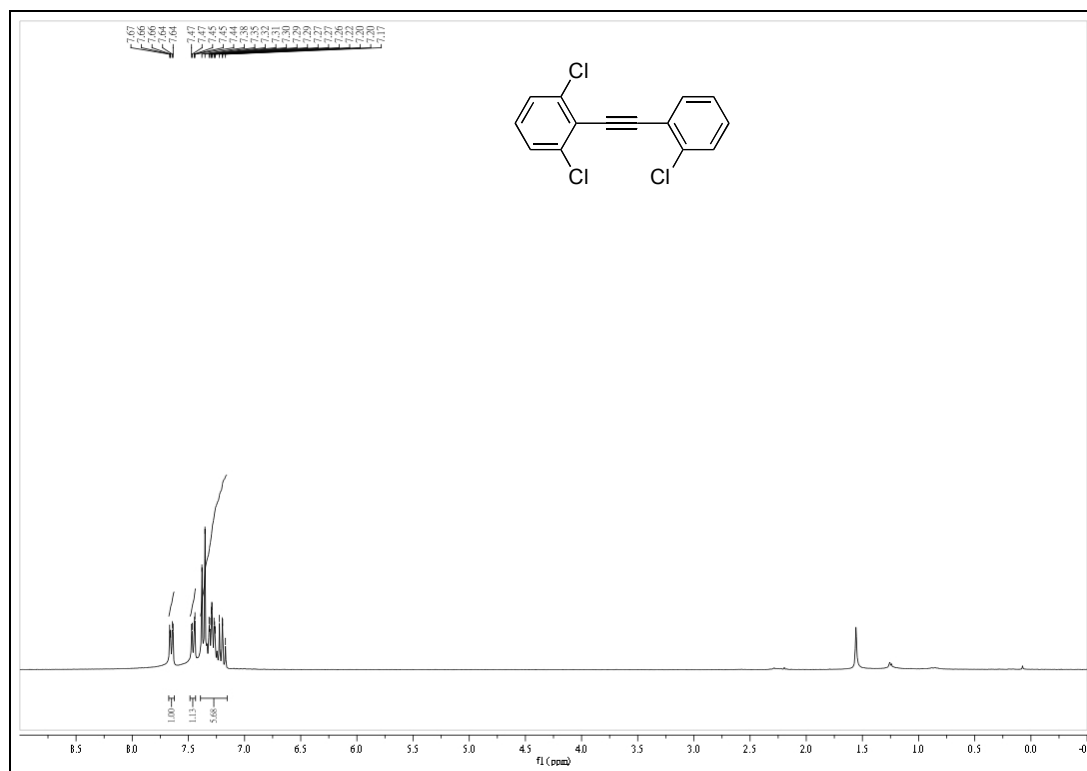

$^{13}\text{C}$ -NMR spectrum of 2,2',6-trichlorodiphenylethyne (75.5 MHz,  $\text{CDCl}_3$ ):

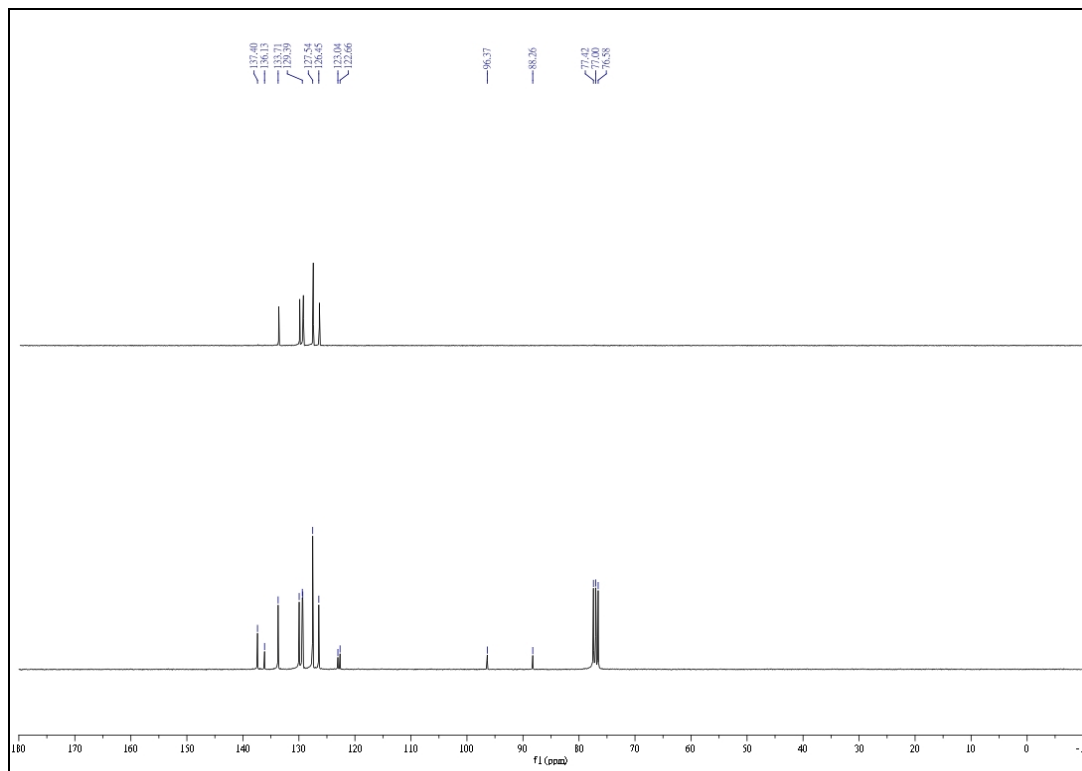

<sup>1</sup>H-NMR spectrum of 3-isopropyl-2-phenylamine (300 MHz, CDCl<sub>3</sub>):

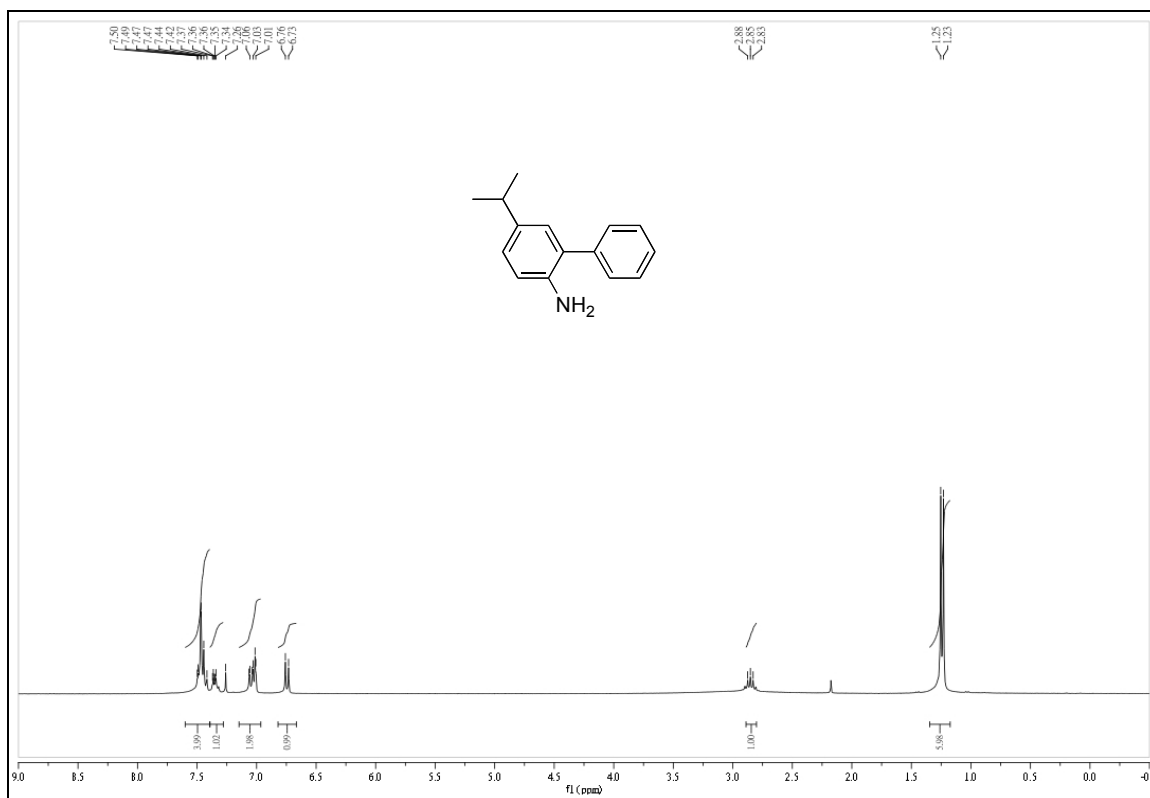

<sup>13</sup>C-NMR spectrum of 2-phenyl-4-isopropylaniline (75.5 MHz, CDCl<sub>3</sub>):



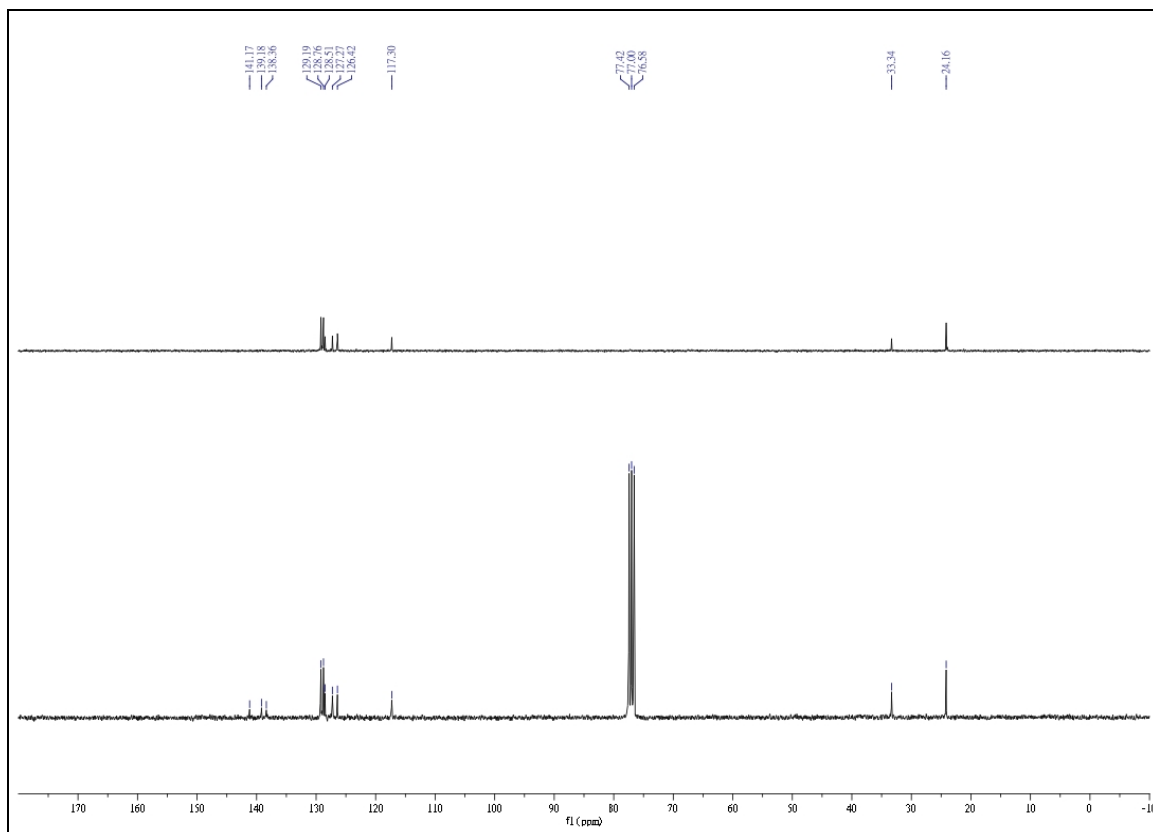

<sup>1</sup>H-NMR spectrum of biphenyl 7-*i*Pr (300 MHz, CDCl<sub>3</sub>):

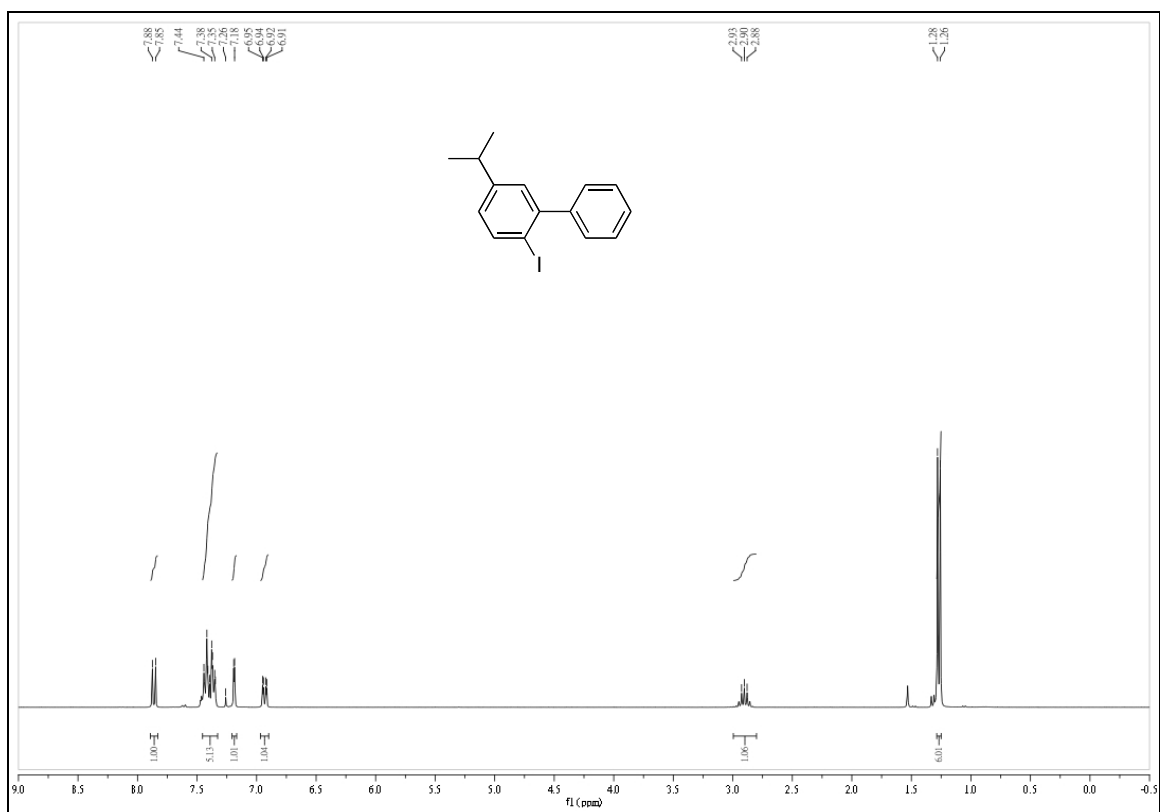

<sup>13</sup>C-NMR spectrum of biphenyl 7-*i*Pr (75.5 MHz, CDCl<sub>3</sub>):

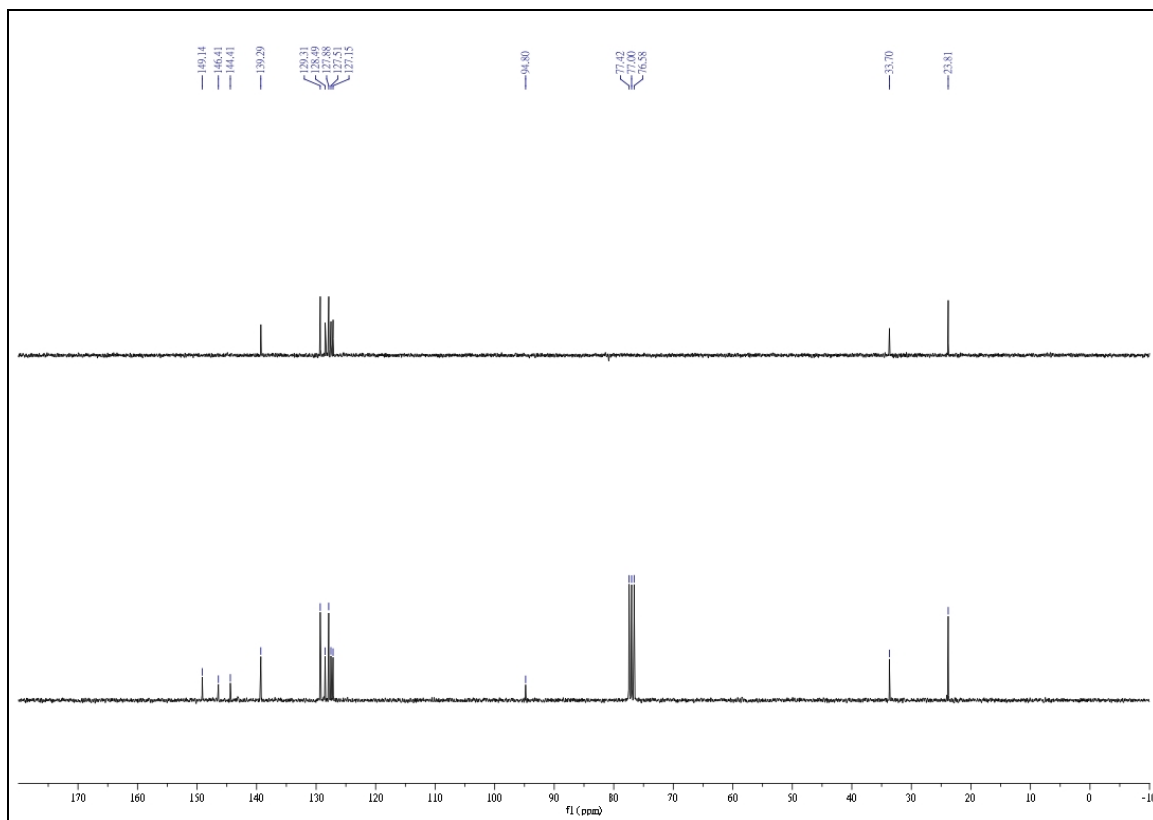

$^1\text{H}$ -NMR spectrum of phenanthrene 3-H (300 MHz,  $\text{CDCl}_3$ ):

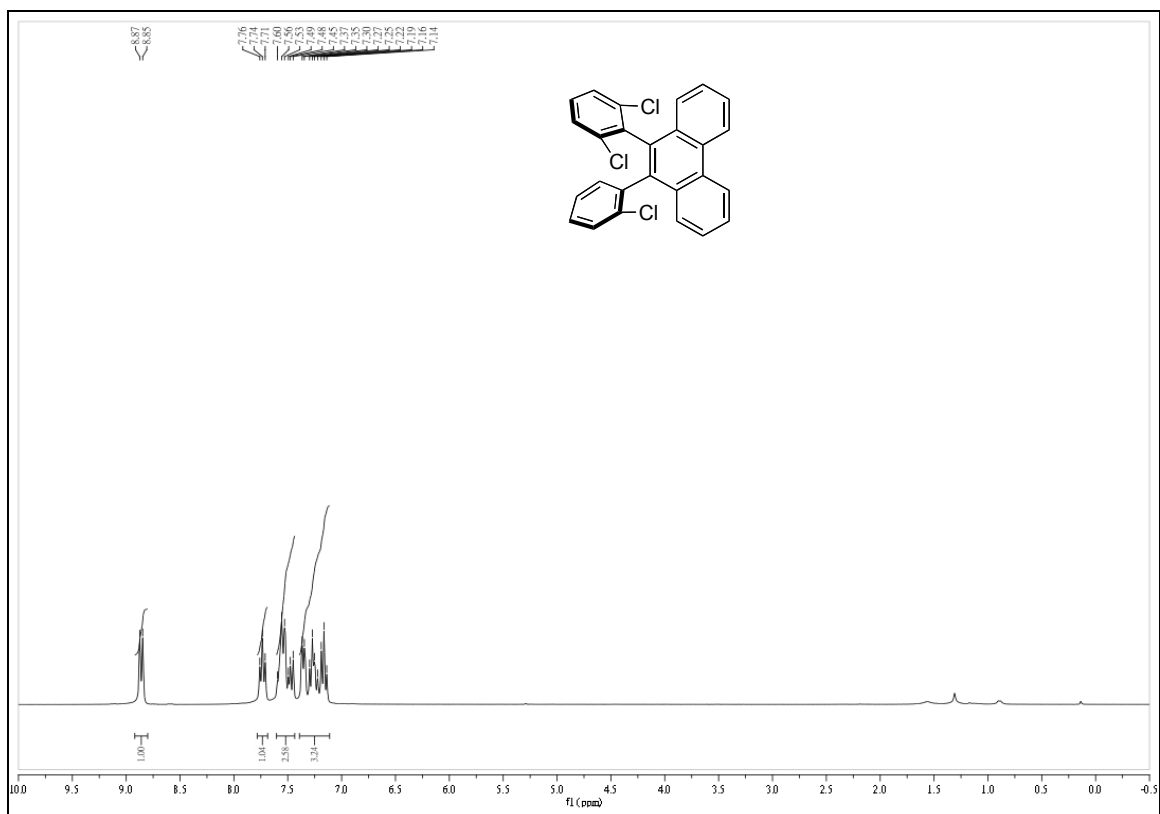

$^{13}\text{C}$ -NMR spectrum of phenanthrene 3-H (75.5 MHz,  $\text{CDCl}_3$ ):

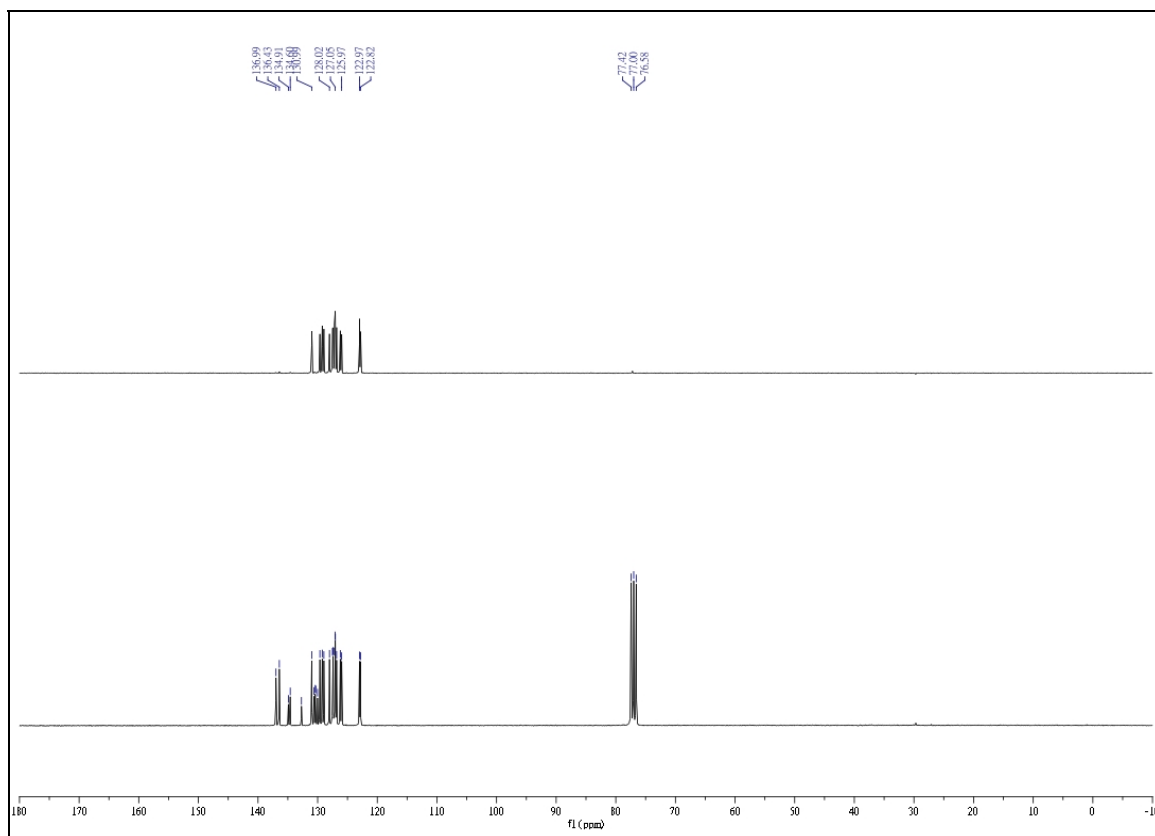

<sup>1</sup>H-NMR spectrum of phenanthrene **3-iPr** (300 MHz, CDCl<sub>3</sub>):

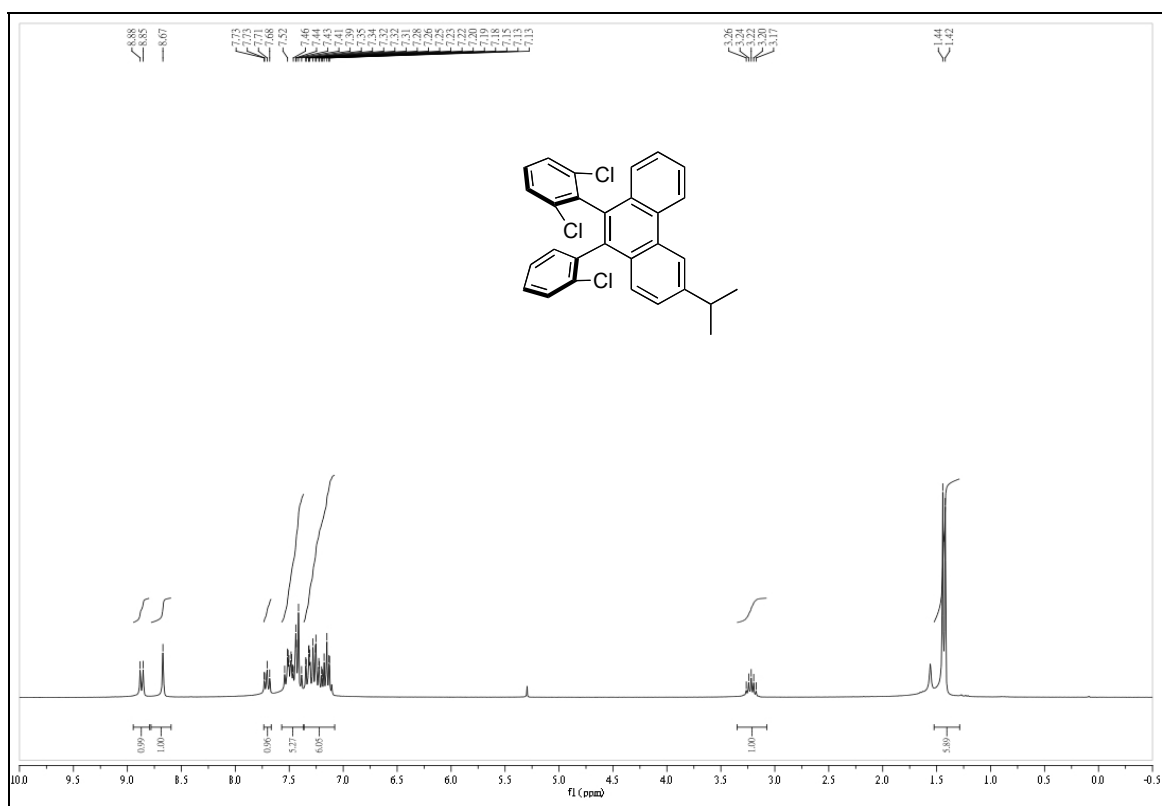

<sup>13</sup>C-NMR spectrum of phenanthrene **3-iPr** (75.5 MHz, CDCl<sub>3</sub>):

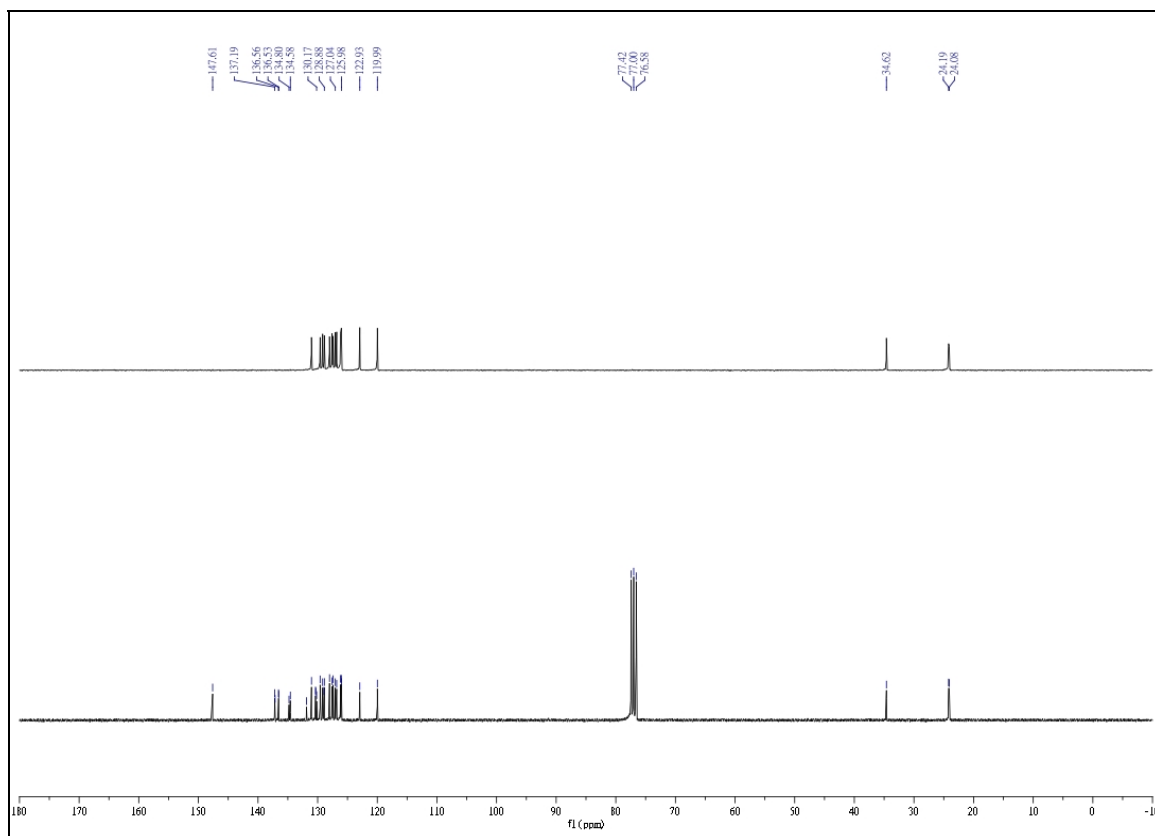

<sup>1</sup>H-NMR spectrum of **crude bulkybowl 2-H** (300 MHz, CDCl<sub>3</sub>):

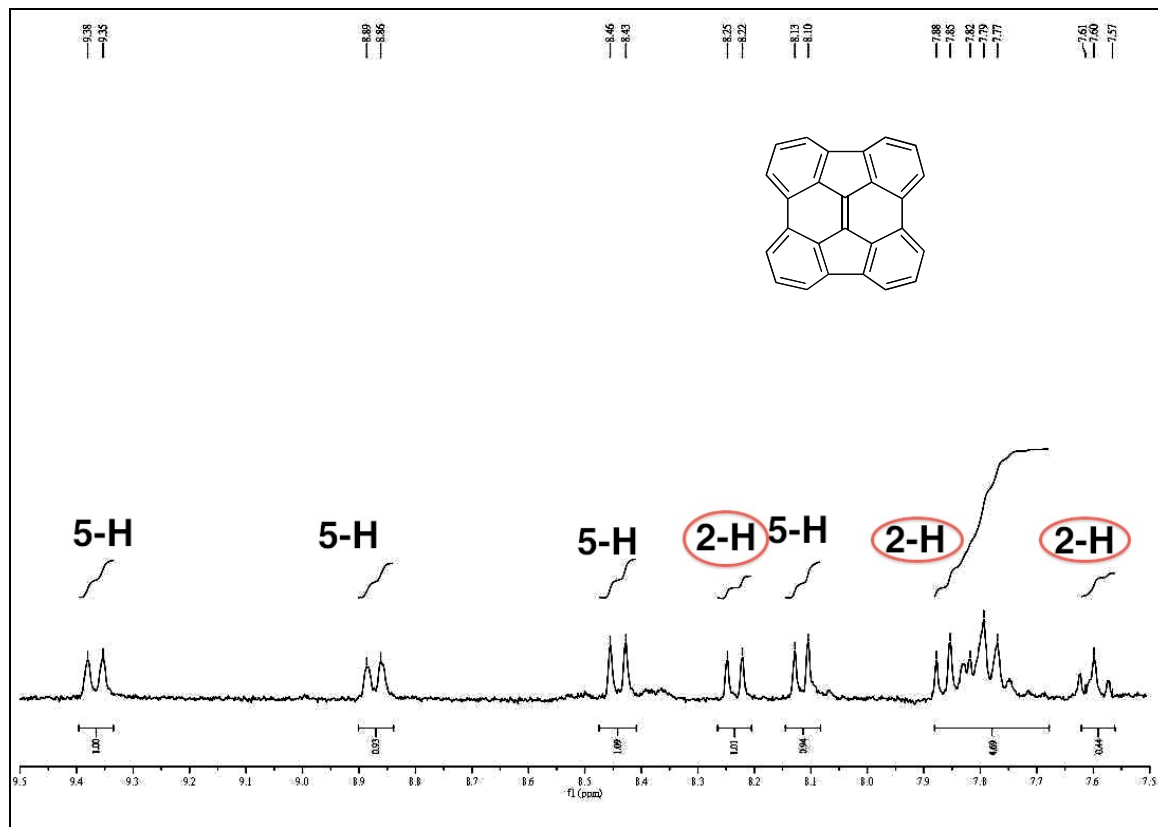

<sup>1</sup>H-NMR spectrum of bulkybowl **2-H** (300 MHz, CD<sub>2</sub>Cl<sub>2</sub>):

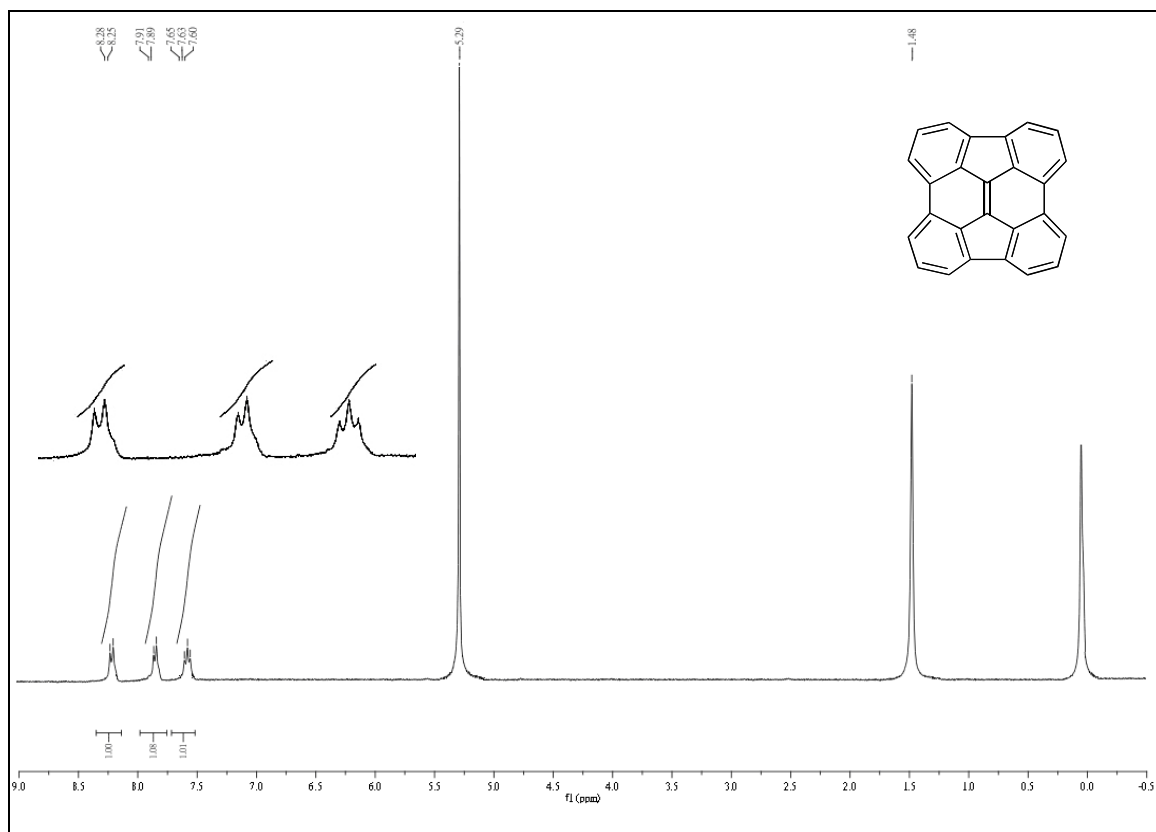

<sup>1</sup>H-NMR spectrum of bulkybowl **2-*i*Pr** (300 MHz, CD<sub>2</sub>Cl<sub>2</sub>):

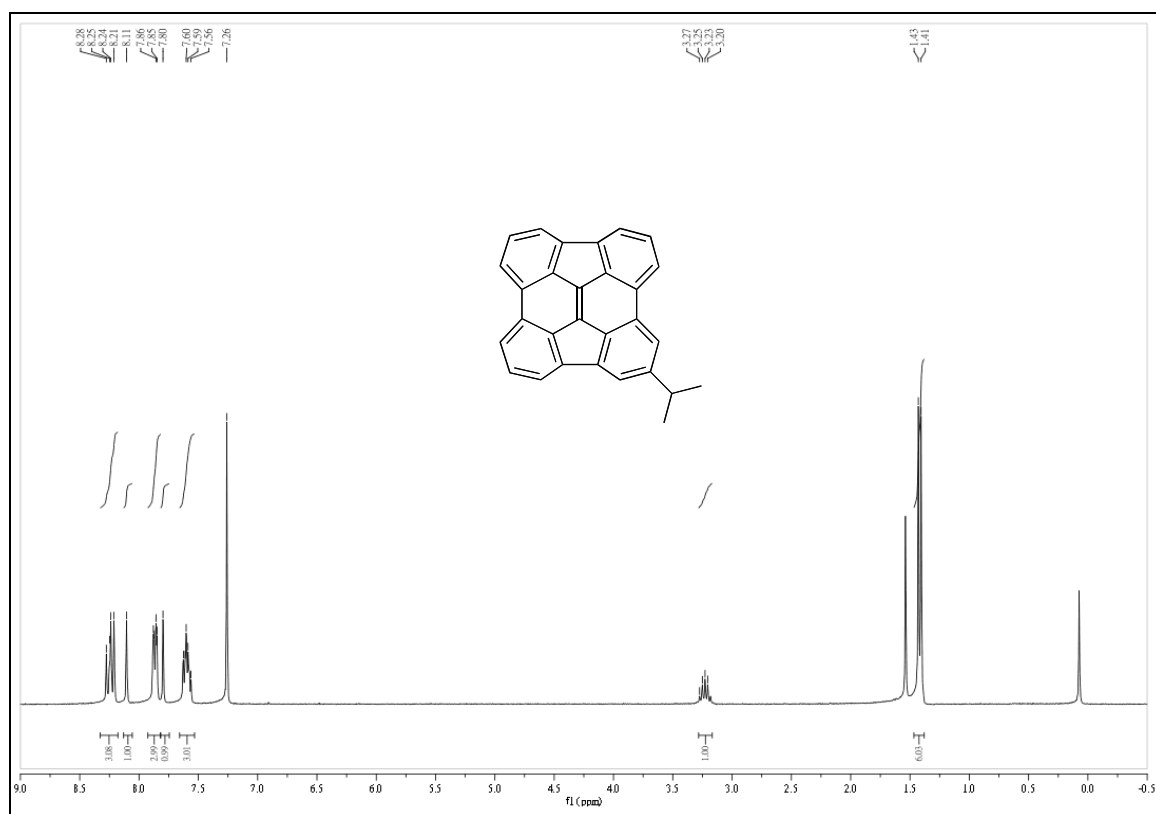

$^{13}\text{C}$ -NMR spectrum of bulkybowl **2-*i*Pr** (75.5 MHz,  $\text{CD}_2\text{Cl}_2$ ):

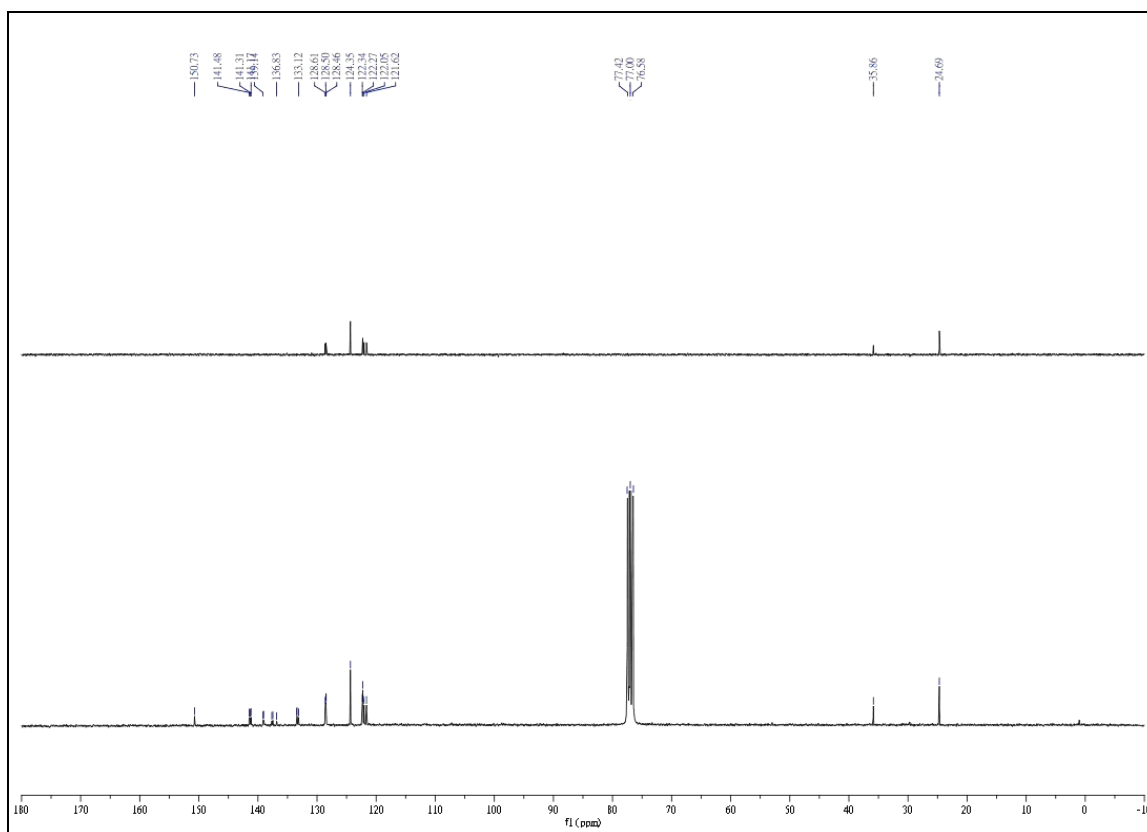

Variable temperature  $^1\text{H}$ -NMR spectra of bulkybowl **2-*i*Pr** (500 MHz,  $\text{CD}_2\text{Cl}_2$ ):  
Signals of the aryl and benzylic protons do not show significant difference.

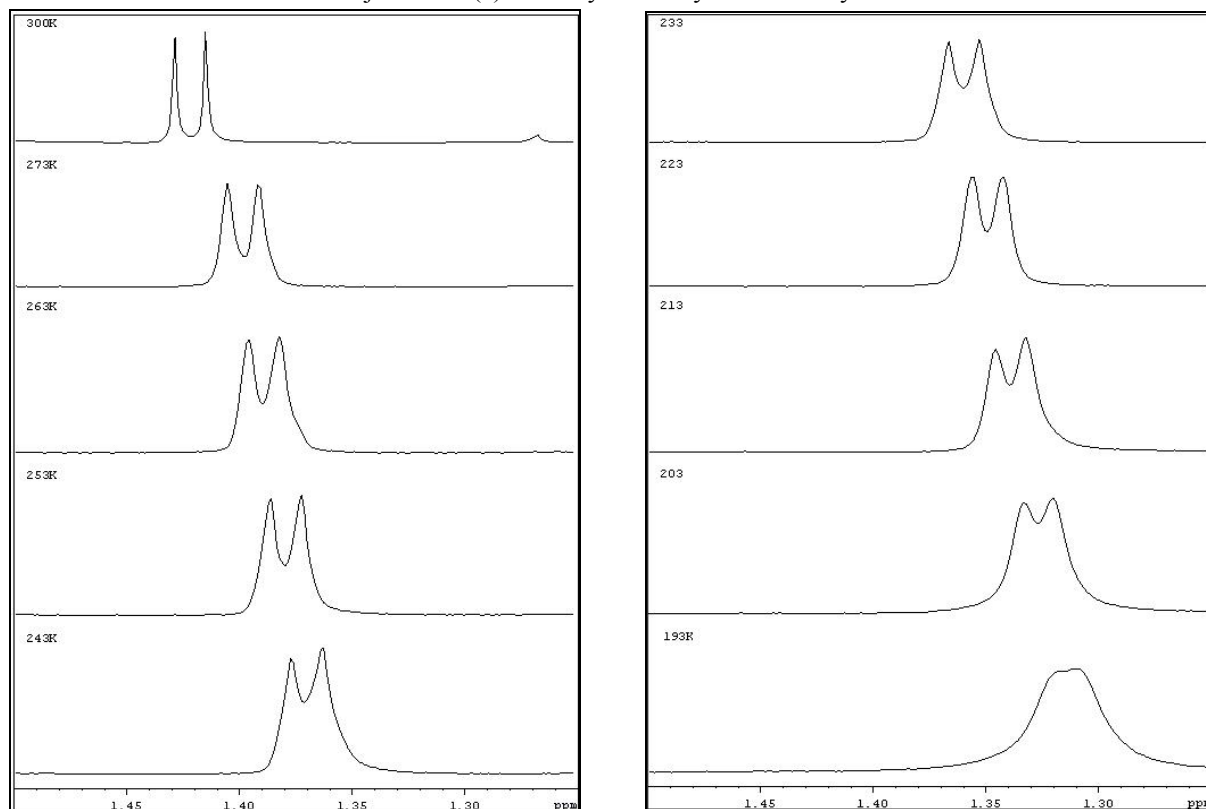

## D. Reference

- S1. D. L. Musso, M. J. Clarke, J. L. Kelley, G. E. Boswell, G. Chen, *Org. Biomol. Chem.*, 2003, **1**, 498
- S2. L. Liu, Y. Zhang, Y. Wang, *J. Org. Chem.*, 2005, **70**, 6122.
- S3. H. E. Bronstein, N. Choi and L. T. Scott, *J. Am. Soc. Chem.*, 2001, **124**, 8870.
